# Supplementary material for: New Rare Ent-Clerodane Diterpene Peroxides from Egyptian Mountain Tea (Qourtom) and Its Chemosystem as Herbal Remedies and Phytonutrients Agents
Source: PubMed Central journal article supplement (PMC7248853; doi:10.3390/molecules25092172), 2020-05-06
Supplement: molecules-25-02172-s001.pdf [file molecules-25-02172-s001.pdf]

## Supplementary Materials

# New rare *ent*-clerodane diterpene peroxides from Egyptian Mountain tea (Qourtom) and its chemosystematic as herbal remedies and phytonutrients agents.

Taha A. Hussien<sup>1</sup>, Ahmed A. Mahmoud<sup>2\*</sup>, Naglaa S. Mohamed<sup>3</sup>, Abdelaaty A. Shahat<sup>4,5\*</sup>, Hesham R. El-Seedi<sup>6,7,8,9\*</sup>, Mohamed Elamir F. Hegazy<sup>5\*</sup>

<sup>1</sup> Pharmacognosy Department, Faculty of Pharmacy, Deraya University, Minia, Egypt; thussien71@yahoo.com (T.A.H.)

<sup>2</sup> Chemistry Department, Faculty of Science, Minia University, El-Minia 61519, Egypt; amahmoud@mu.edu.eg (A.A.M)

<sup>3</sup> Chemistry Department, Faculty of Science, Aswan University, Aswan 81528, Egypt; naglaanaglaa@yahoo.com (N.S.M.)

<sup>4</sup> Pharmacognosy Department, College of Pharmacy, King Saud University, P.O. Box 2457, Riyadh 11451, Saudi Arabia; alalqahtani@ksu.edu.sa (A.S.A.); ashahat@ksu.edu.sa (A.A.S.)

<sup>5</sup> Chemistry of Medicinal Plants Department, National Research Centre, 33 El-Bohouth St., Dokki, Giza, 12622, Egypt; ashahat@ksu.edu.sa (A.A.S.), elamir77@live.com (M.-E.F.H)

<sup>6</sup> The Wenner-Gren Institute, Stockholm University, S-106 91, Stockholm, Sweden

<sup>7</sup> International Research Center for Food Nutrition and Safety, Jiangsu University, Zhenjiang 212013, China

<sup>8</sup> Al-Rayan Research and Innovation Center, Al-Rayan Colleges, Medina 42541, Saudi Arabia

<sup>9</sup> Pharmacognosy Group, Department of Medicinal Chemistry, Uppsala University, Biomedical Centre, Box 574, 751 23 Uppsala, Sweden

\* Correspondence: [amahmoud@mu.edu.eg](mailto:amahmoud@mu.edu.eg) (A.A. Mahmoud); Tel: +2 01099338896; and [hesham.elseedi@su.se](mailto:hesham.elseedi@su.se) (H.R. E-S) Tel.: +46 73 5668234; [elamir77@live.com](mailto:elamir77@live.com) (M.E.F.Hegazy) Tel.: +2 033371635

Received: date; Accepted: date; Published: date

Received: date; Accepted: date; Published: date

| Supporting data                                                  | Page |
|------------------------------------------------------------------|------|
| <b>S1:</b> <sup>1</sup> H NMR of <b>1</b> .....                  | 3    |
| <b>S2:</b> <sup>13</sup> C NMR of <b>1</b> .....                 | 4    |
| <b>S3:</b> DEPT-135 of <b>1</b> .....                            | 5    |
| <b>S4:</b> <sup>1</sup> H <sup>1</sup> H COSY of <b>1</b> .....  | 6    |
| <b>S5:</b> HSQC of <b>1</b> .....                                | 7    |
| <b>S6:</b> HMBC of <b>1</b> .....                                | 8    |
| <b>S7:</b> NOESY of <b>1</b> .....                               | 9    |
| <b>S8:</b> FABMS of <b>1</b> .....                               | 10   |
| <b>S9:</b> HRFABMS of <b>1</b> .....                             | 11   |
| <br>                                                             |      |
| <b>S10:</b> <sup>1</sup> H NMR of <b>2</b> .....                 | 12   |
| <b>S11:</b> <sup>13</sup> C NMR of <b>2</b> .....                | 13   |
| <b>S12:</b> DEPT-135 of <b>2</b> .....                           | 14   |
| <b>S13:</b> <sup>1</sup> H <sup>1</sup> H COSY of <b>2</b> ..... | 16   |
| <b>S14:</b> HSQC of <b>2</b> .....                               | 15   |
| <b>S15:</b> HMBC of <b>2</b> .....                               | 17   |
| <b>S16:</b> NOESY of <b>2</b> .....                              | 18   |
| <b>S17:</b> FABMS of <b>2</b> .....                              | 19   |
| <b>S18:</b> HRFABMS of <b>2</b> .....                            | 20   |
| <br>                                                             |      |
| <b>S19:</b> <sup>1</sup> H NMR of <b>4</b> .....                 | 21   |
| <b>S20:</b> <sup>13</sup> C NMR of <b>4</b> .....                | 22   |
| <b>S21:</b> DEPT-135 of <b>4</b> .....                           | 23   |
| <b>S22:</b> <sup>1</sup> H <sup>1</sup> H COSY of <b>4</b> ..... | 24   |
| <b>S23:</b> HSQC of <b>4</b> .....                               | 25   |
| <b>S24:</b> HMBC of <b>4</b> .....                               | 26   |
| <b>S25:</b> NOESY of <b>4</b> .....                              | 27   |
| <b>S26:</b> FABMS of <b>4</b> .....                              | 28   |
| <b>S27:</b> HRFABMS of <b>4</b> .....                            | 29   |

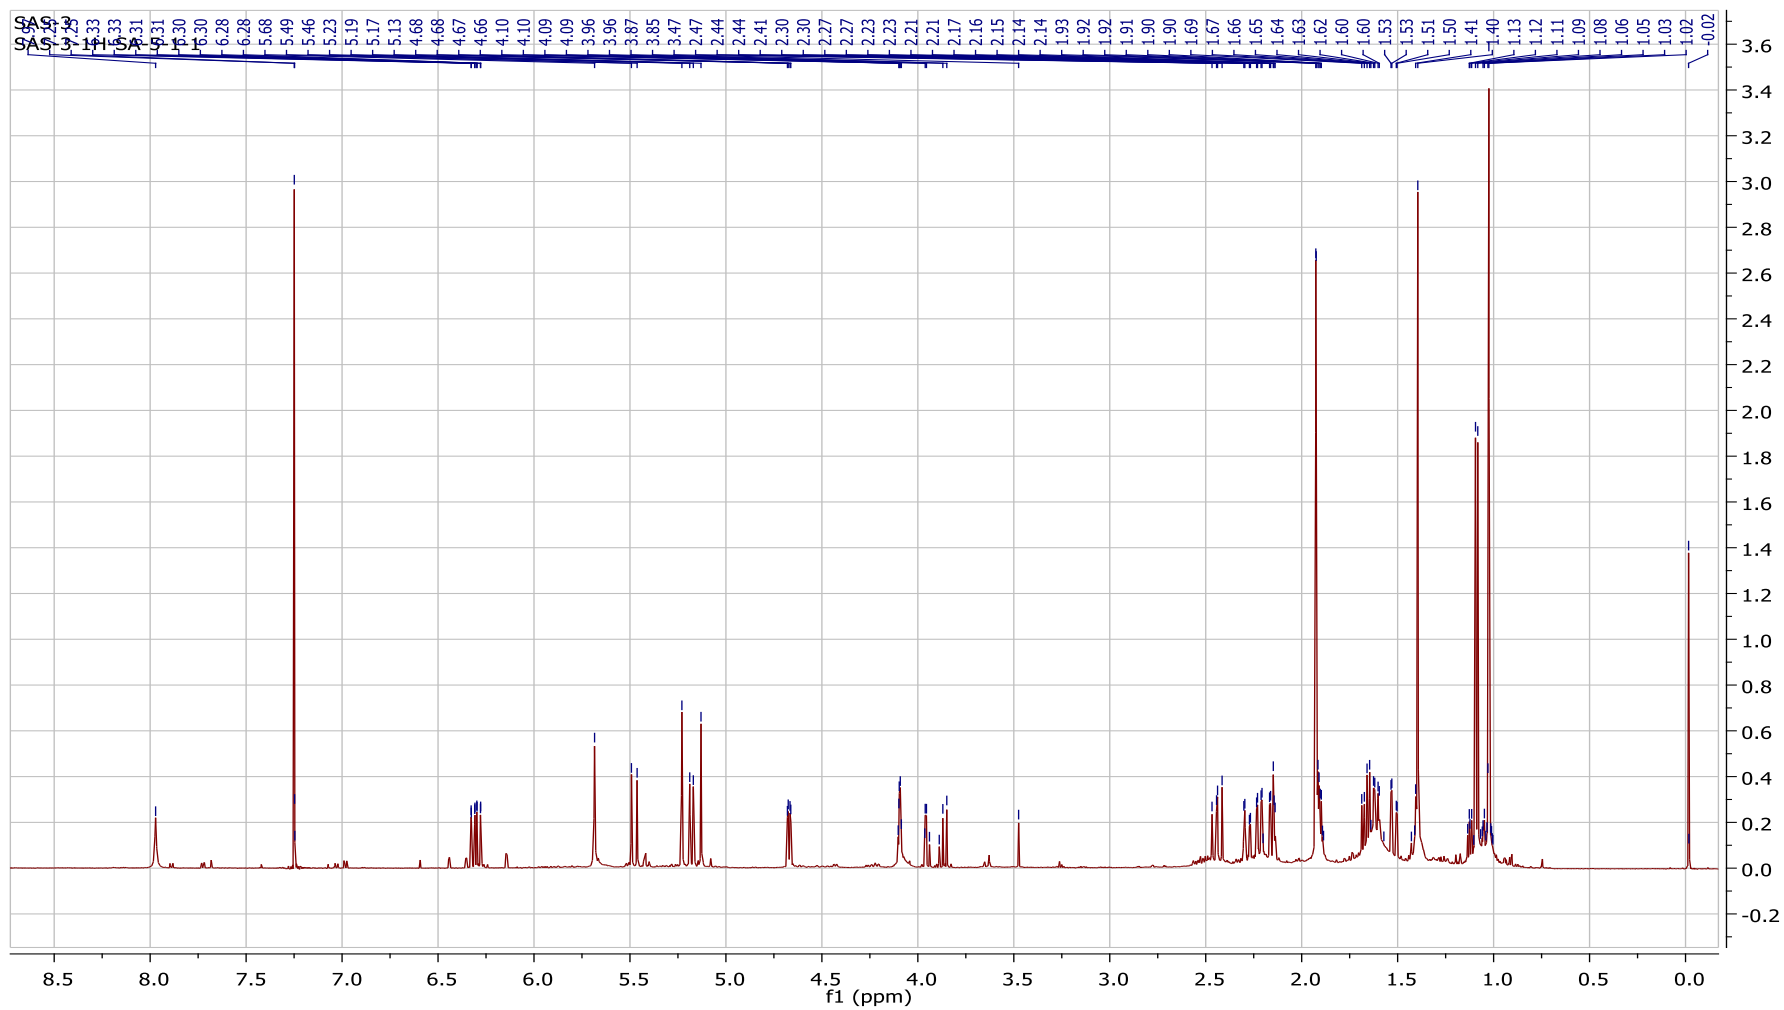

S1: $^1\text{H}$  NMR of **1**

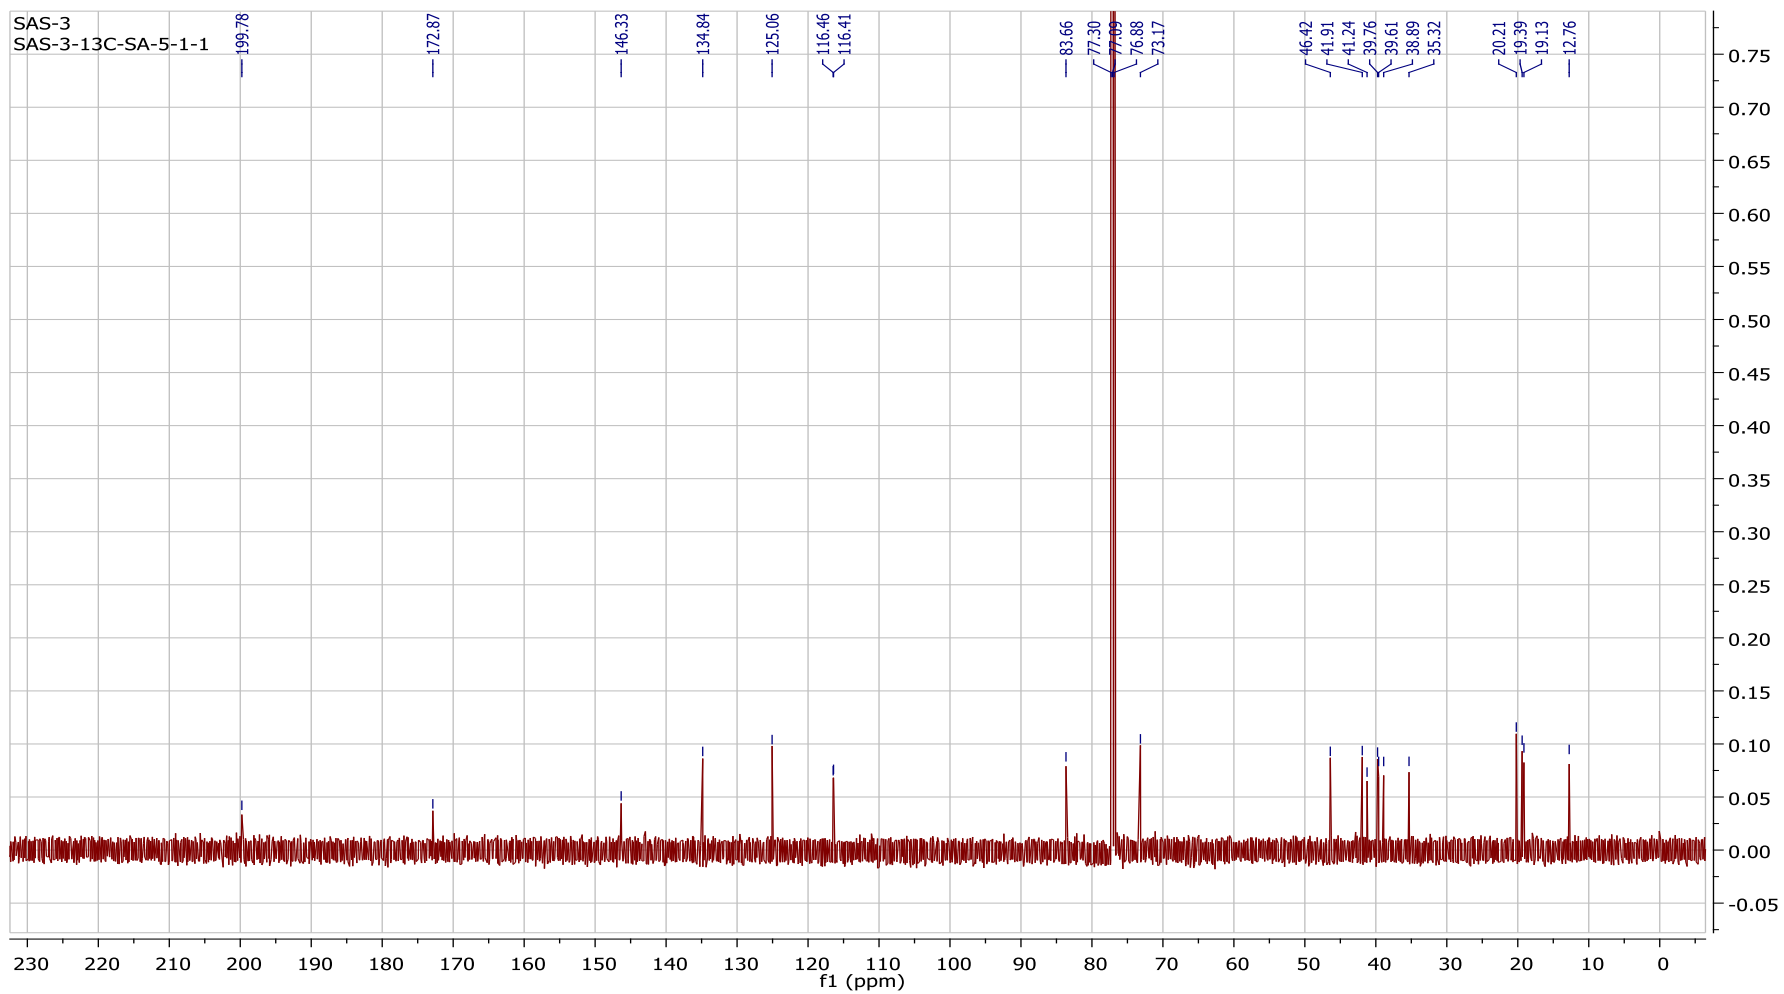

S2:  $^{13}\text{C}$  NMR of 1

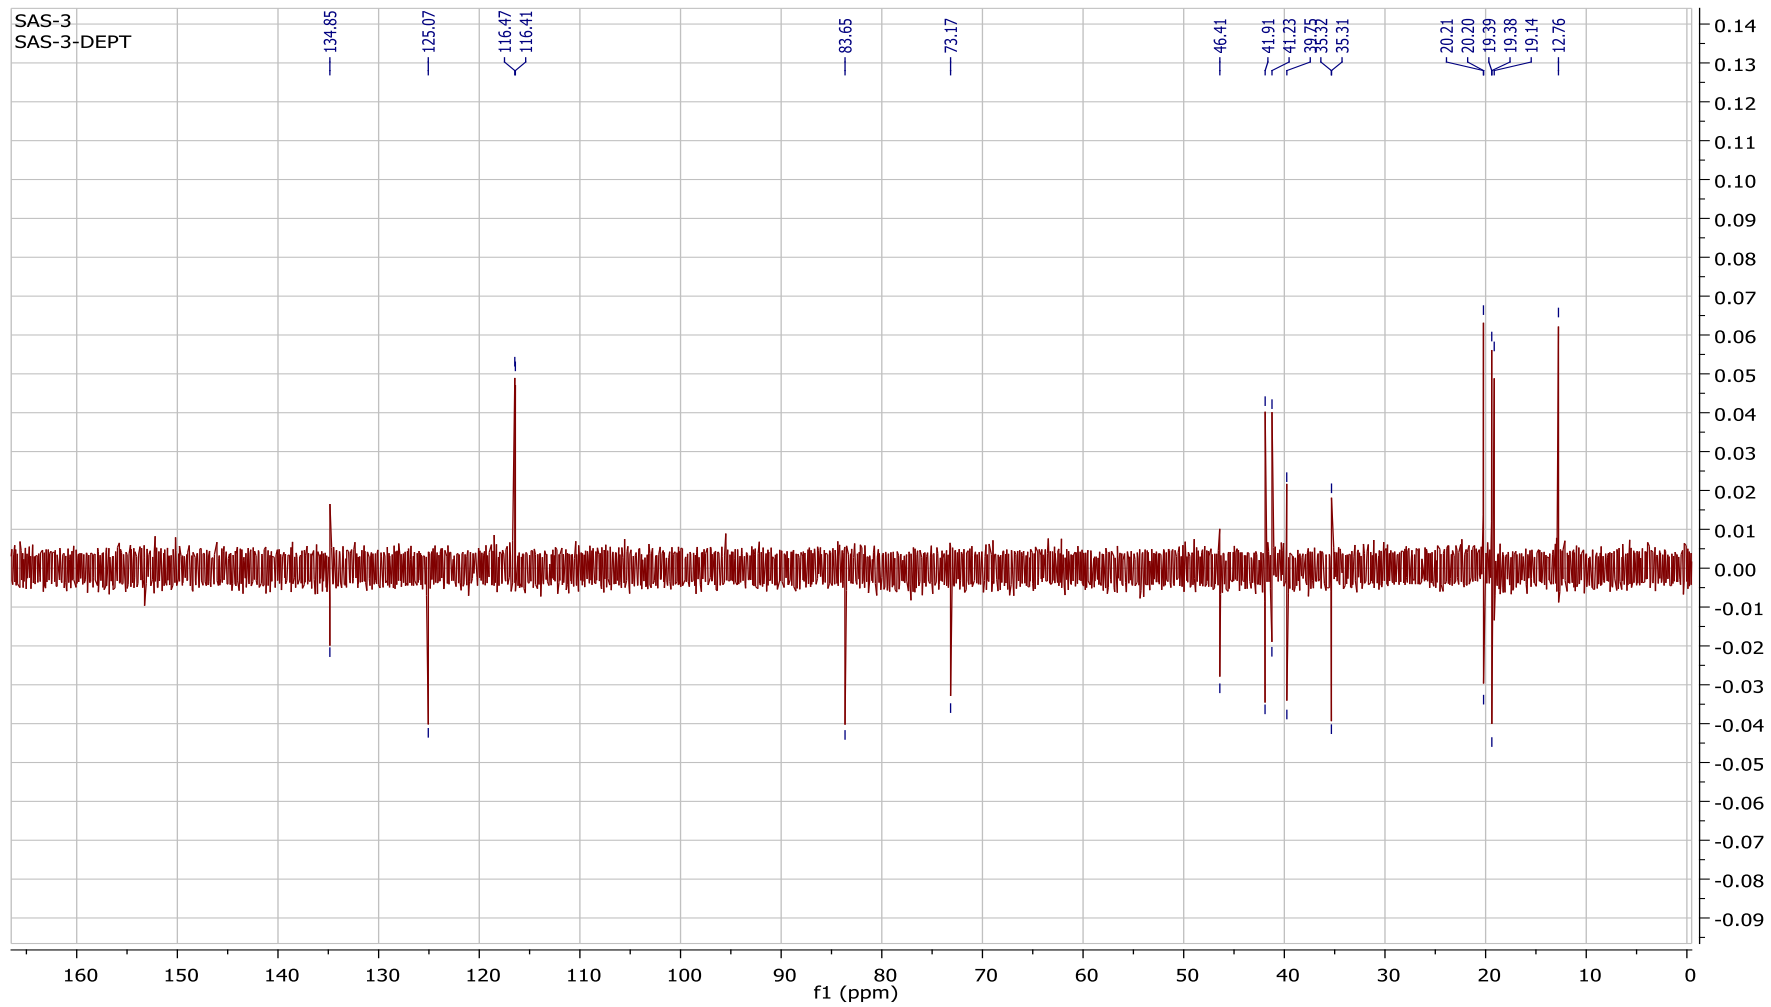

S3:DEPT-135 of 1

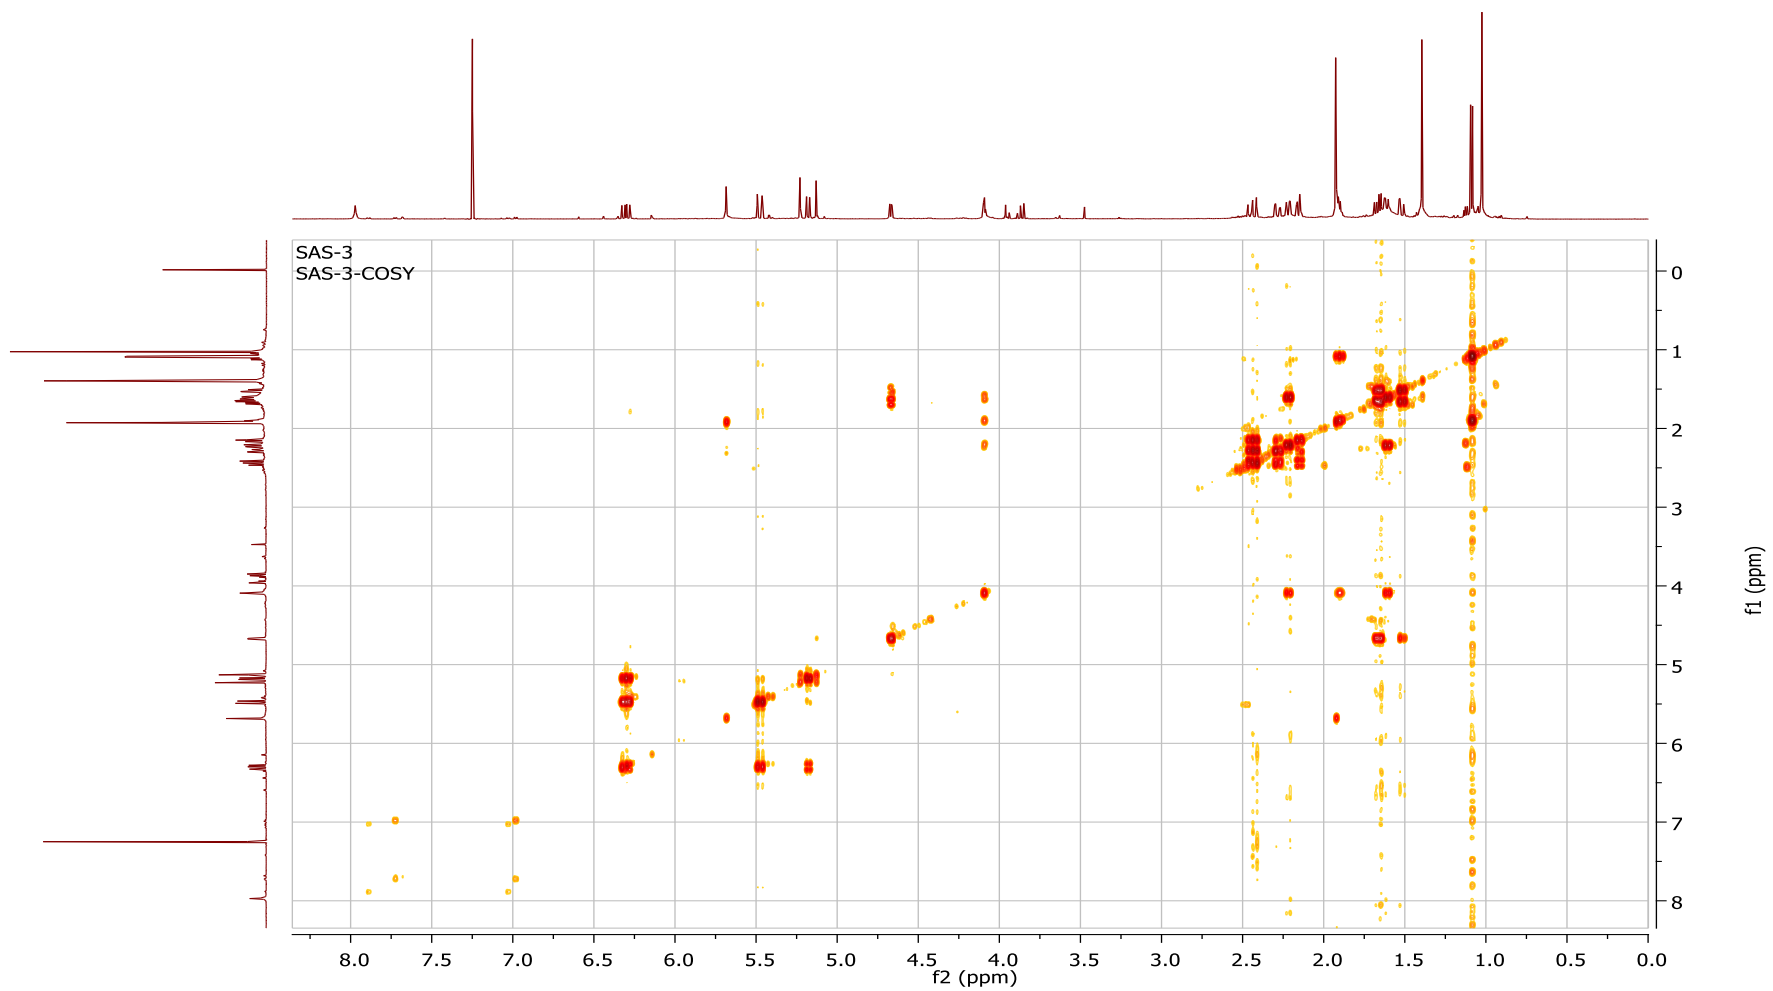

S4:  $^1\text{H}$   $^1\text{H}$  COSY of 1

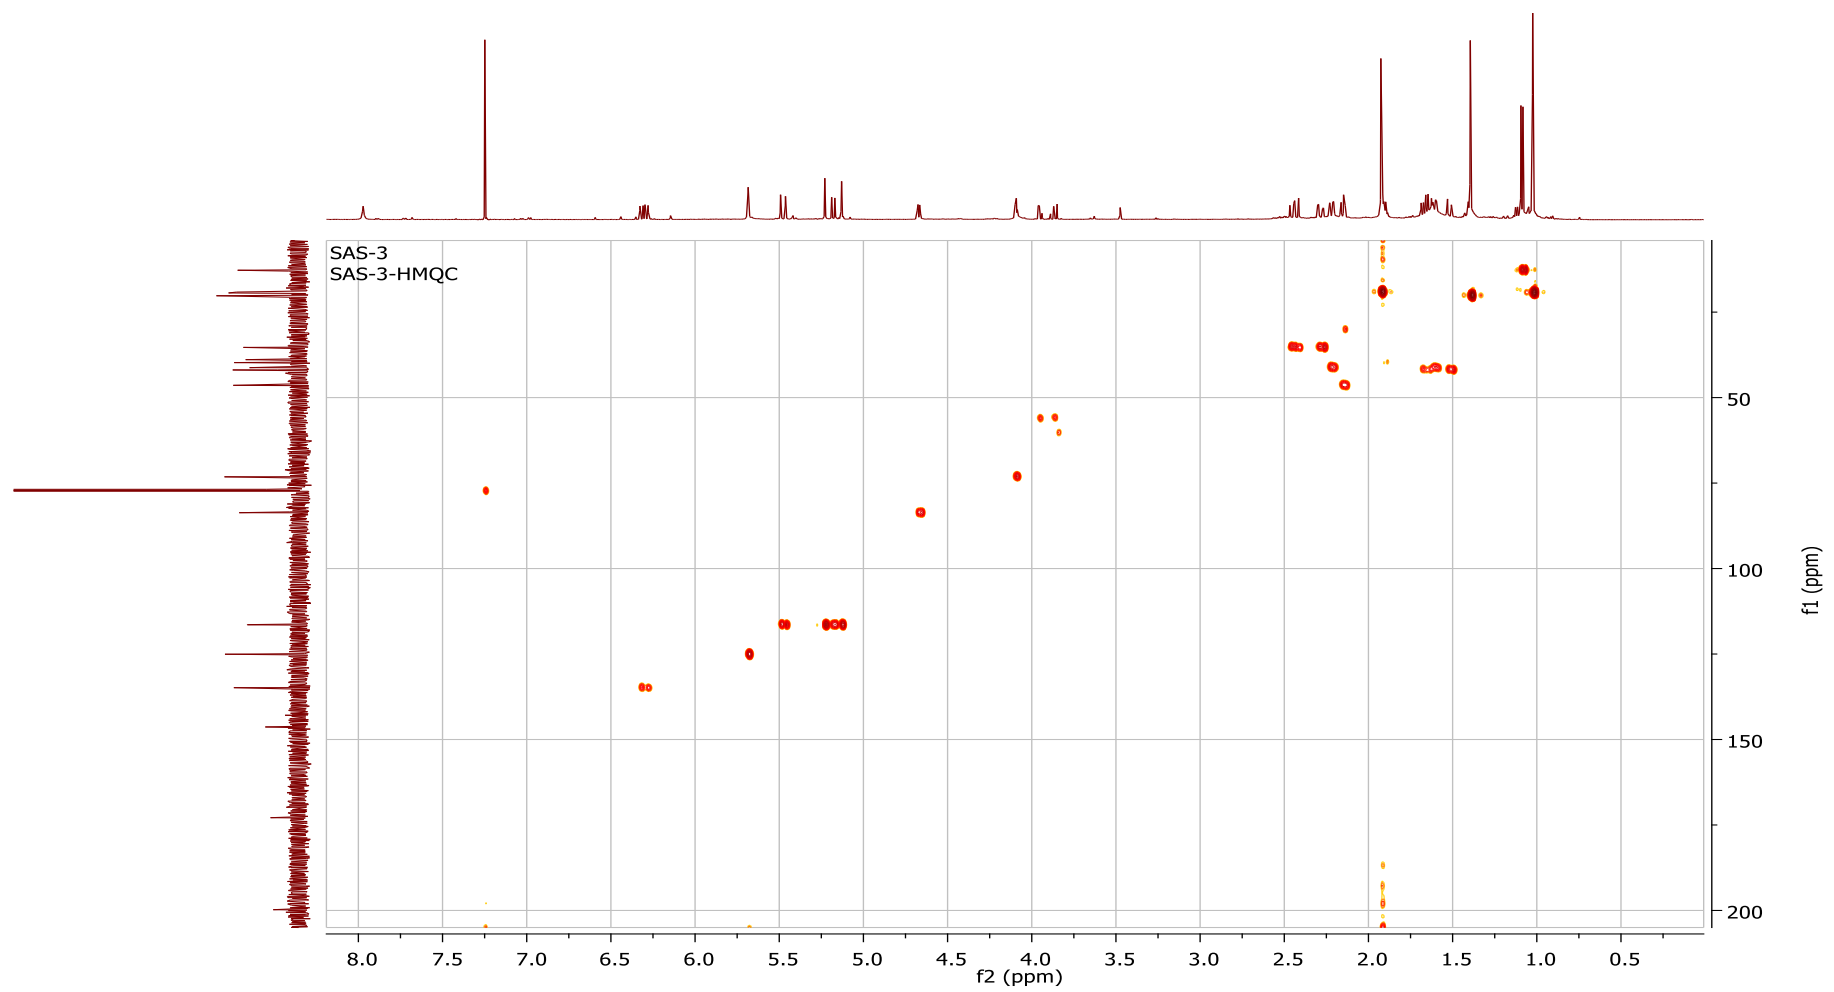

S5:HSQC of 1

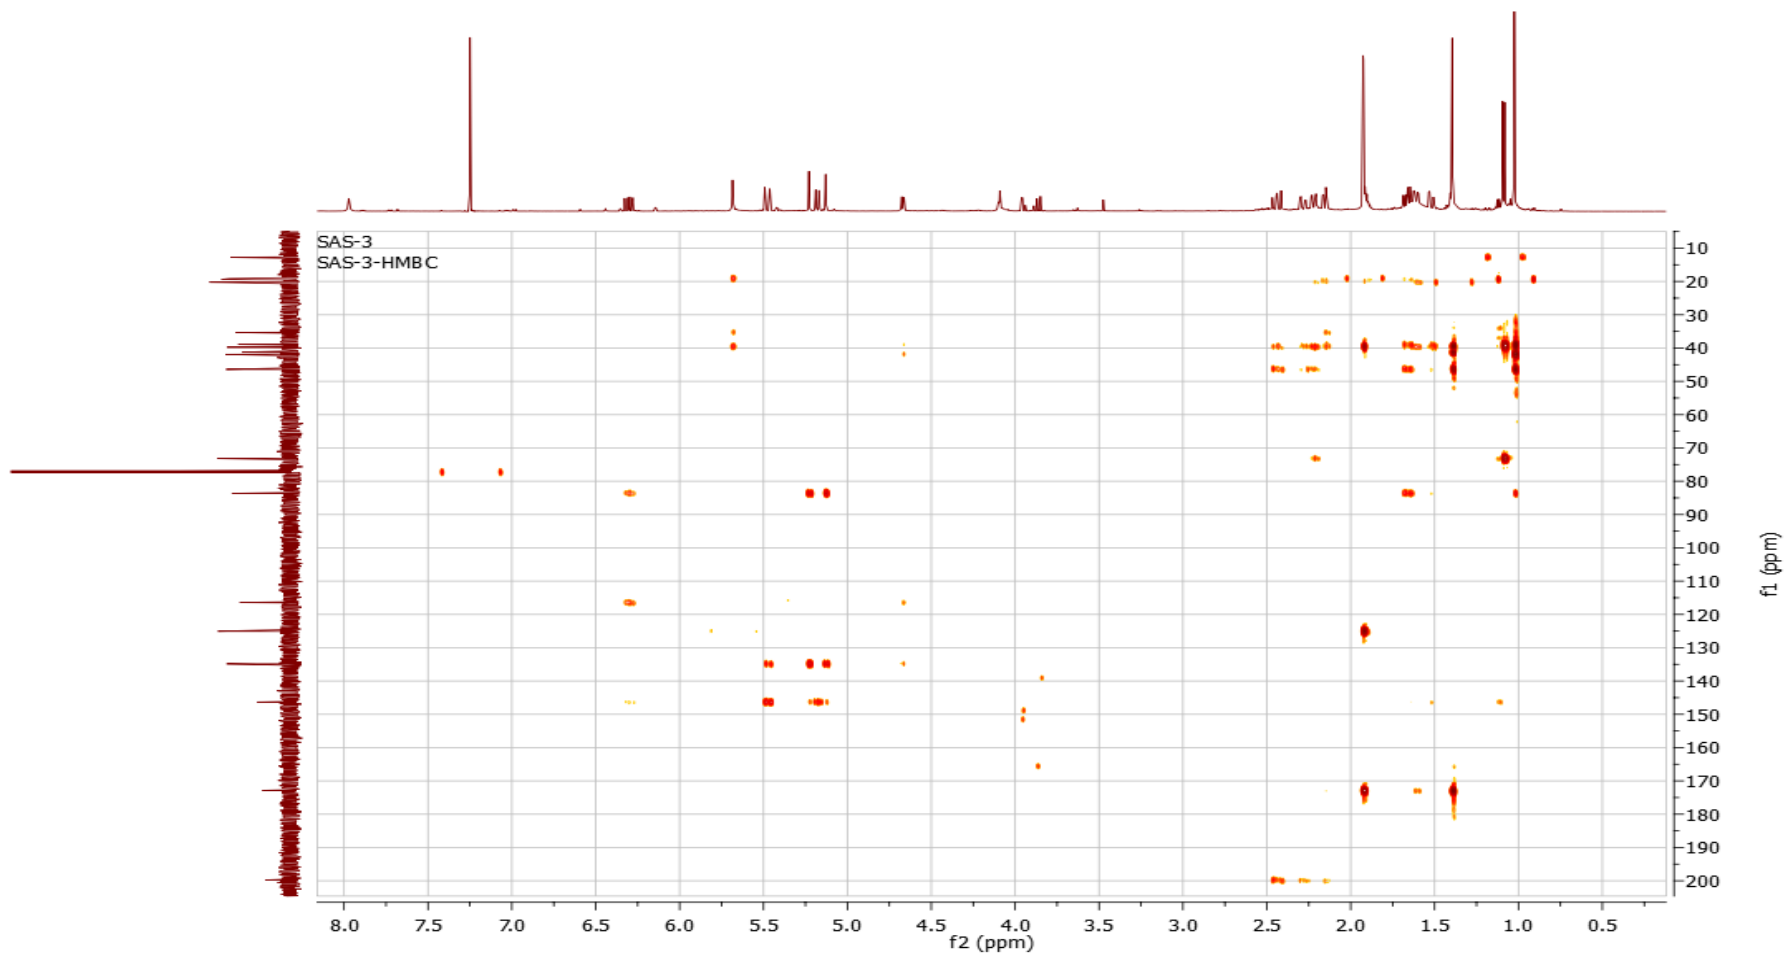

S6:HMBC of 1



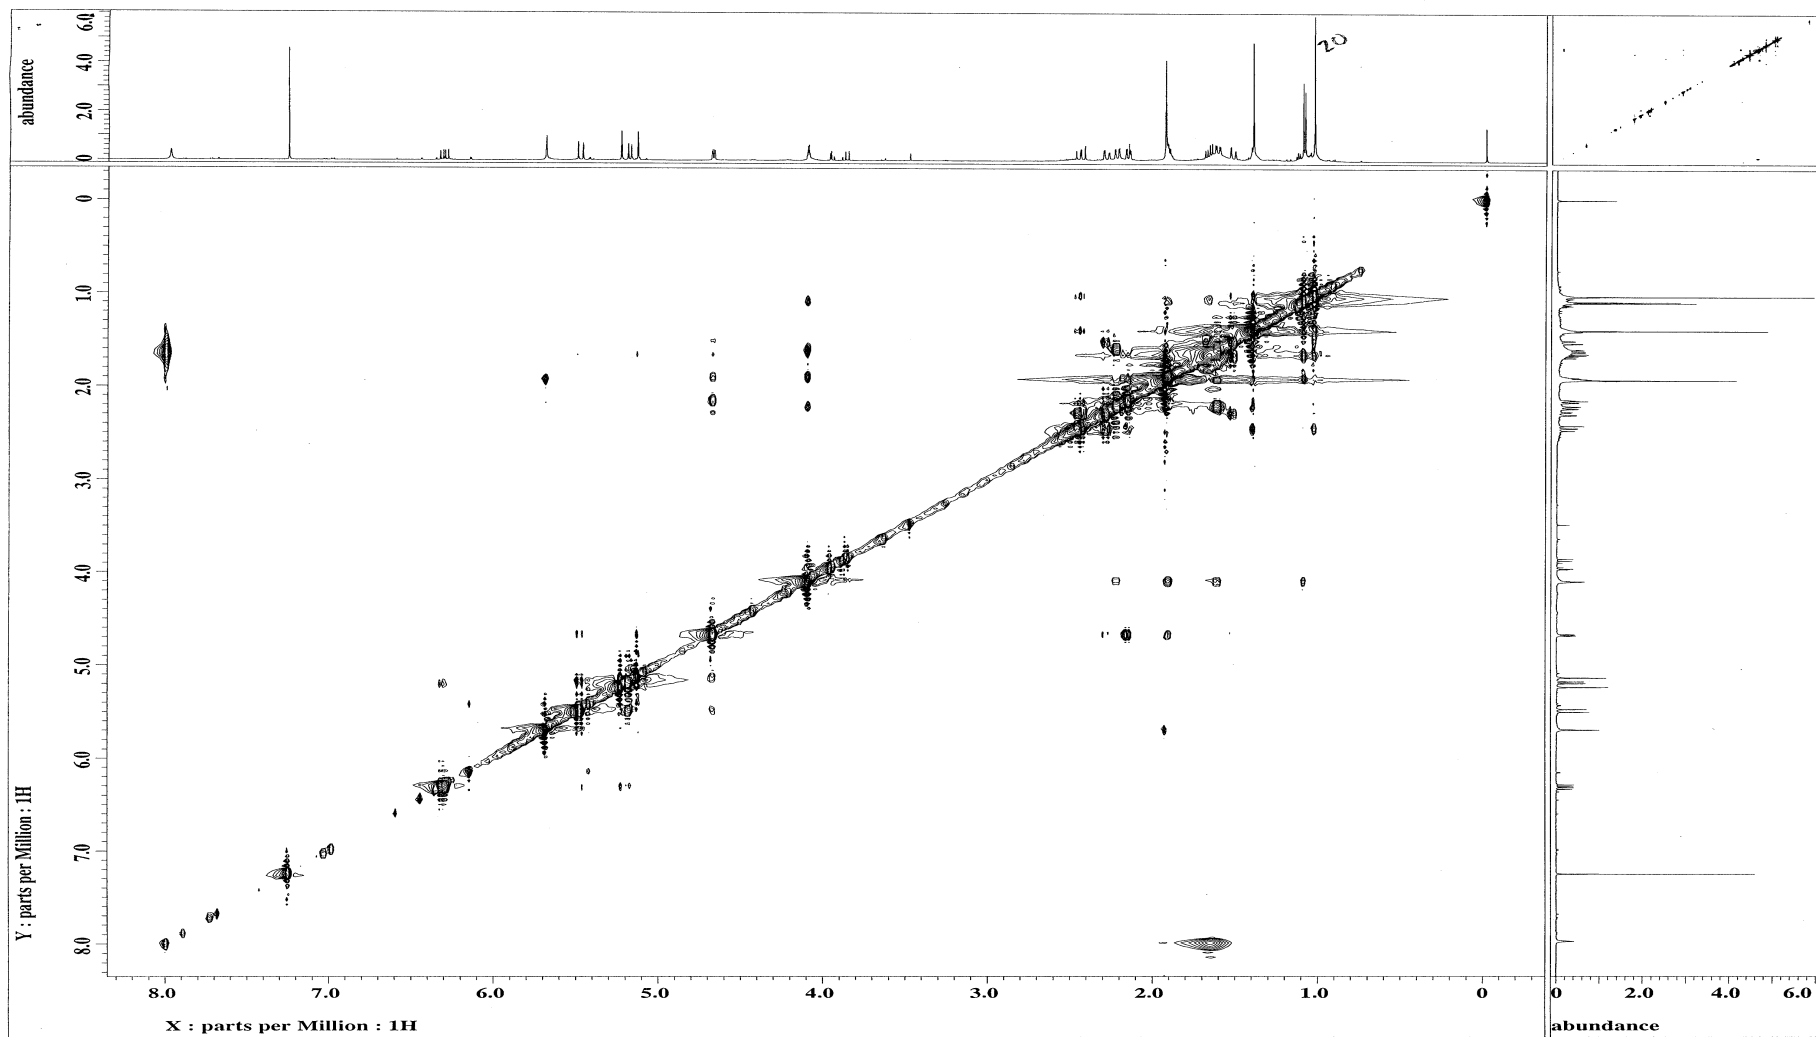

S7:NOESY of 1

Note : 3-NOBA, CHCl3+NaIaq.  
Inlet : Direct Ion Mode : FRB+  
Spectrum Type : Normal Ion [MF-Linear]  
RT : 0.67 min Scan# : 5  
BP : m/z 335.0000 Int. : 878.39  
Output m/z range : 10.0000 to 401.3892 Cut Level : 0.00 %

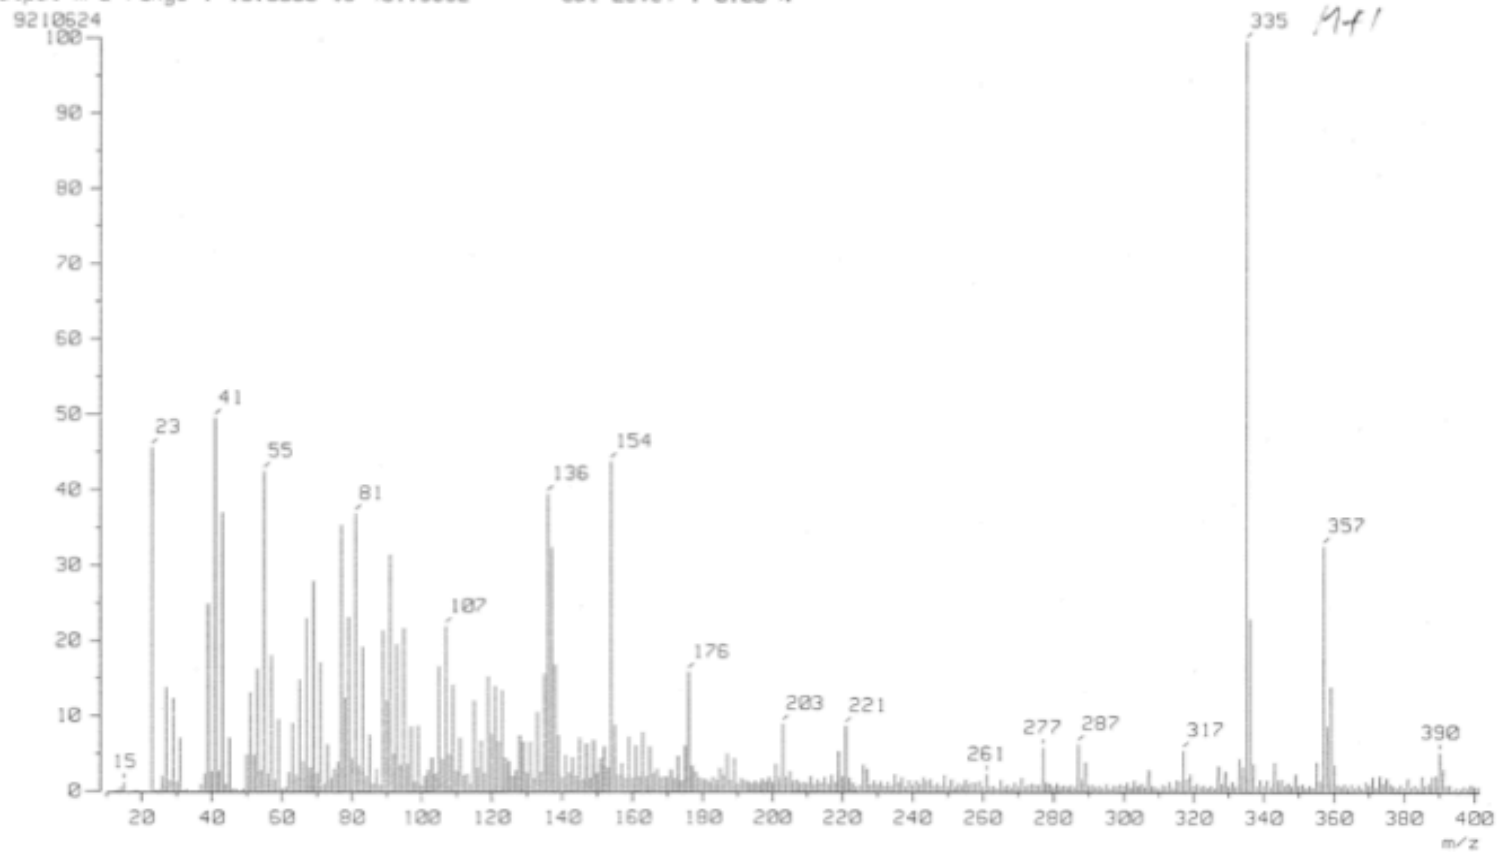

S8: FABMS of 1

Note : 3-NOBA, CHCl<sub>3</sub>+NaIaq.

Inlet : Direct

Ion Mode : FAB+

RT : 0.90 min

Scan#: 4

Elements : C 20/0, H 40/0, O 4/0, Na 1/0

Mass Tolerance : 1000ppm, 3mmu if m/z < 3, 5mmu if m/z > 5

Unsaturation (U.S.) : -0.5 - 20.0

| Observed m/z | Int% | Err[ppm / mmu] | U.S. | Composition      |
|--------------|------|----------------|------|------------------|
| 357.2045     | 16.7 | +1.0 / +0.3    | 5.5  | C 20 H 30 O 4 Na |

S9:HRFABMS of 1

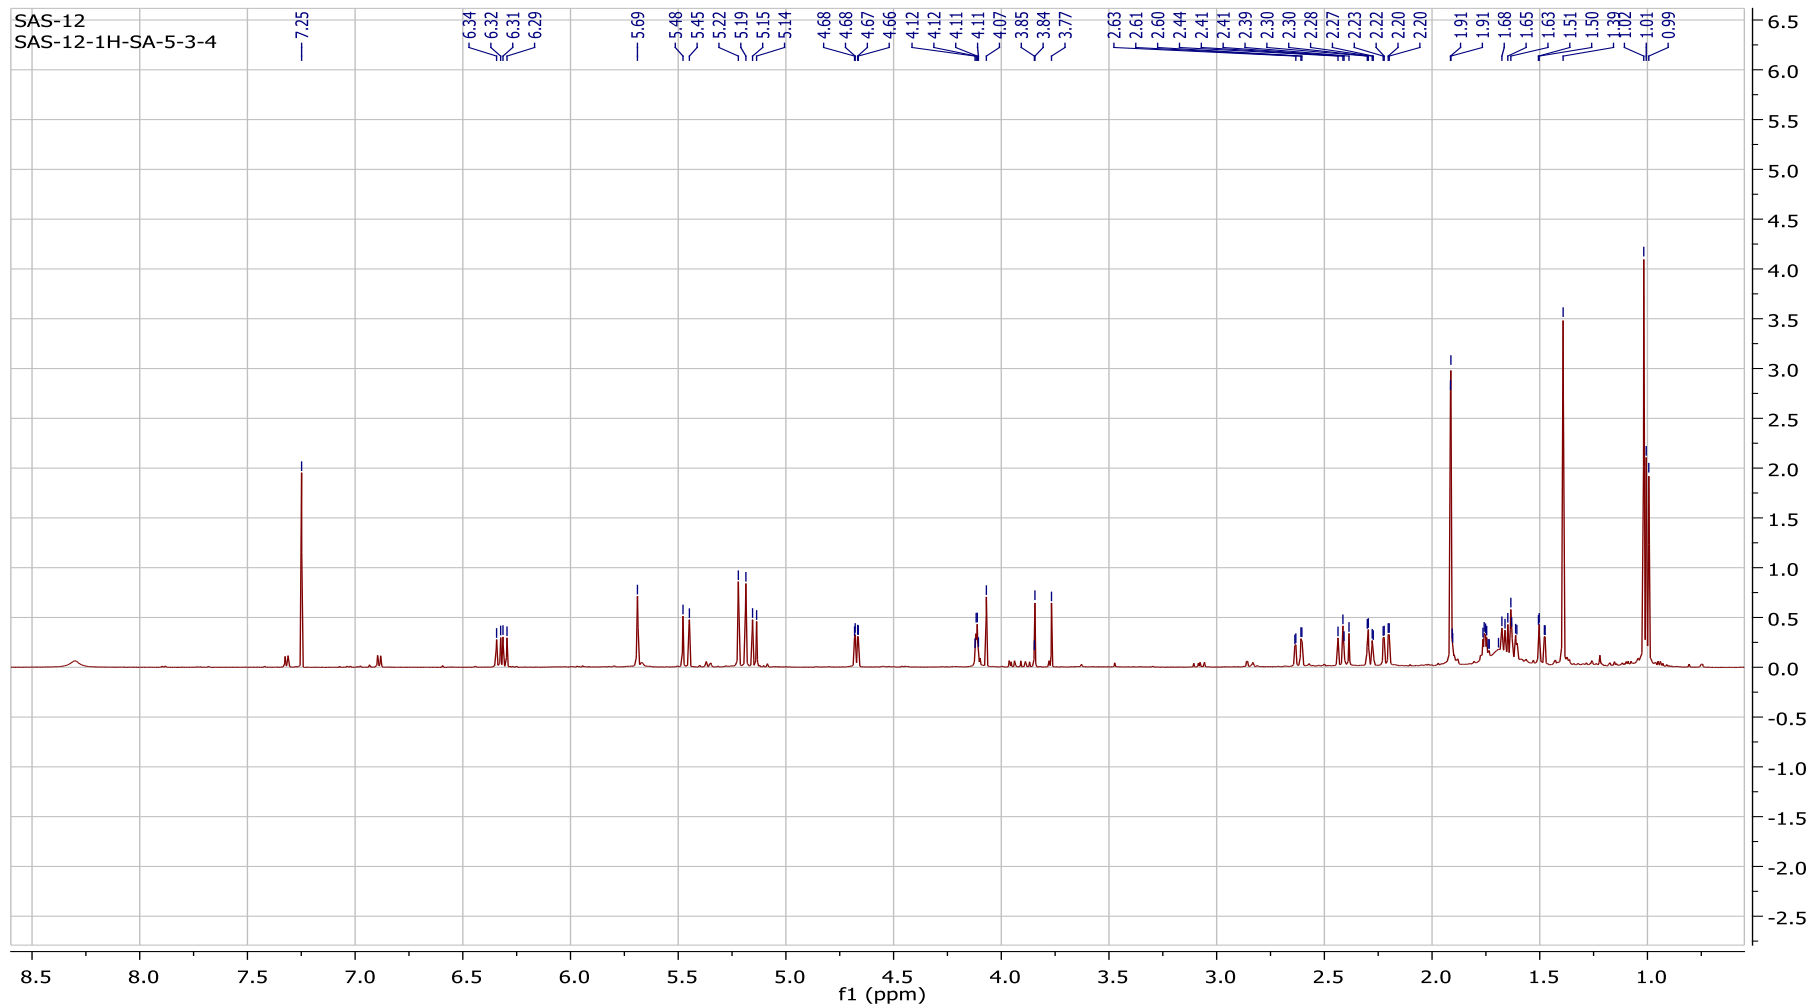

S10:  $^1\text{H}$  NMR of 2

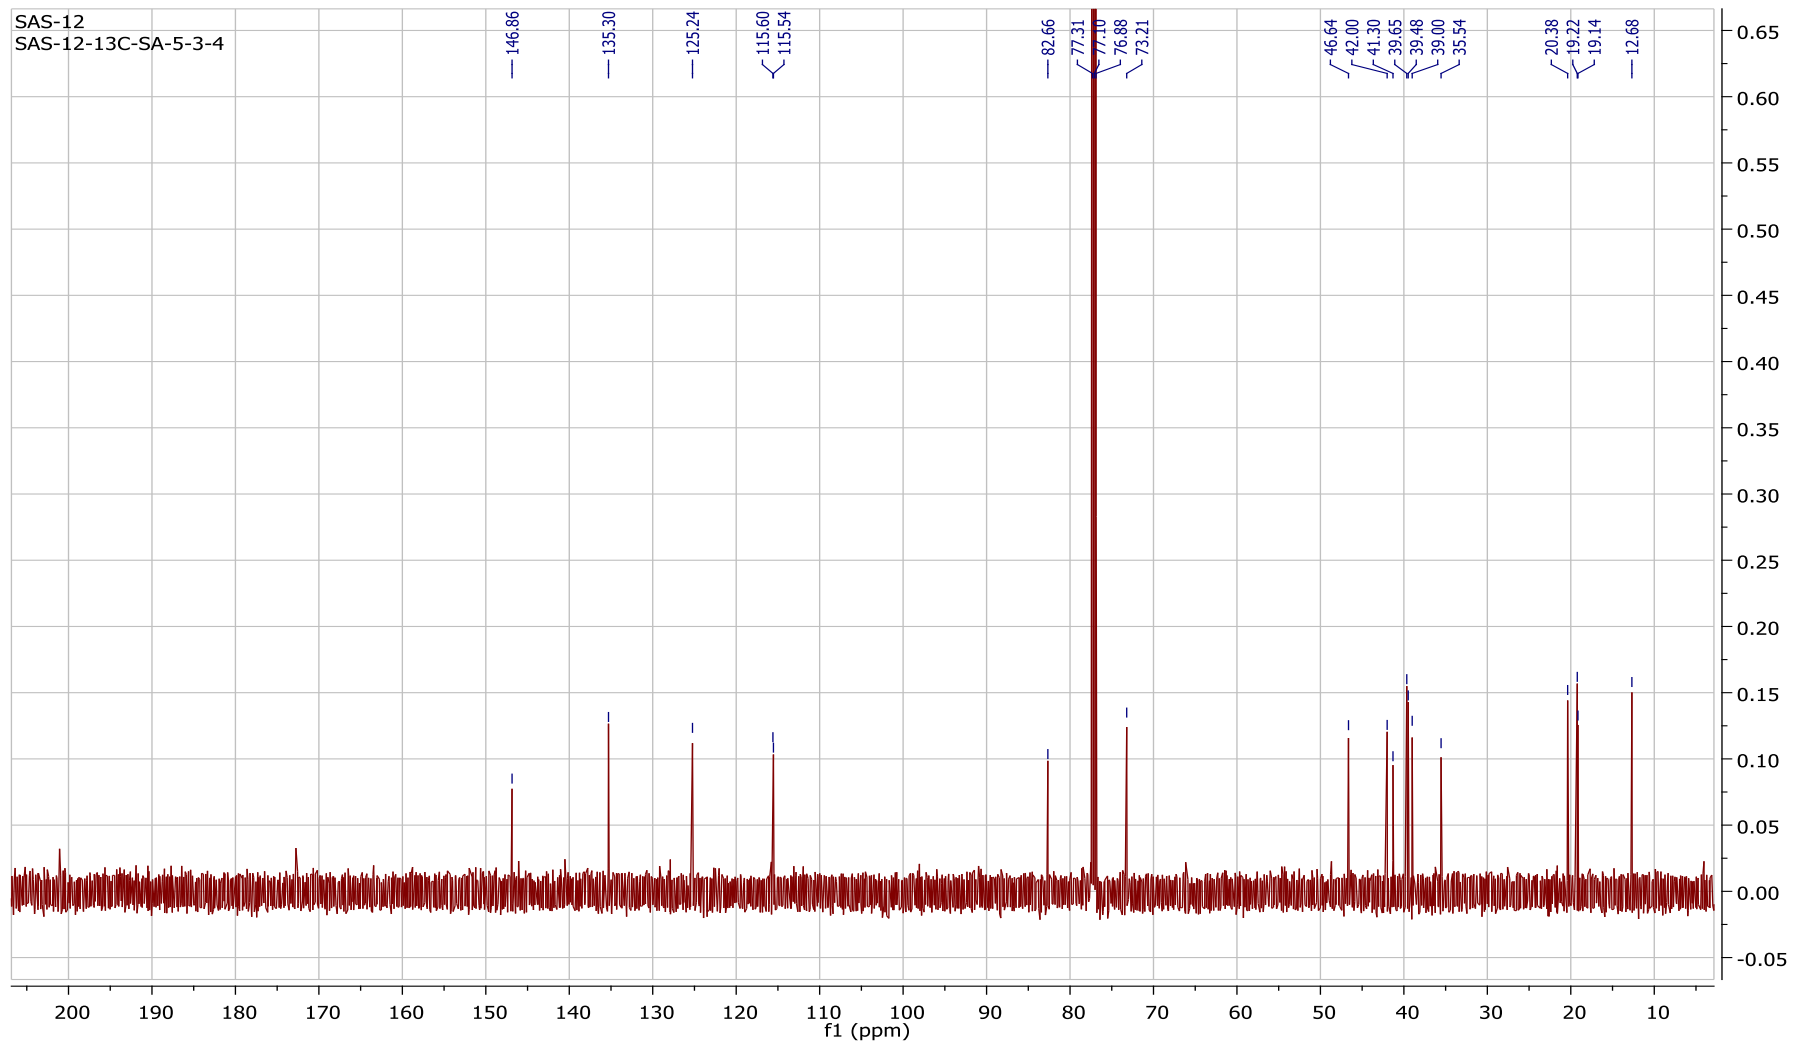

S11:  $^{13}\text{C}$  NMR of 2

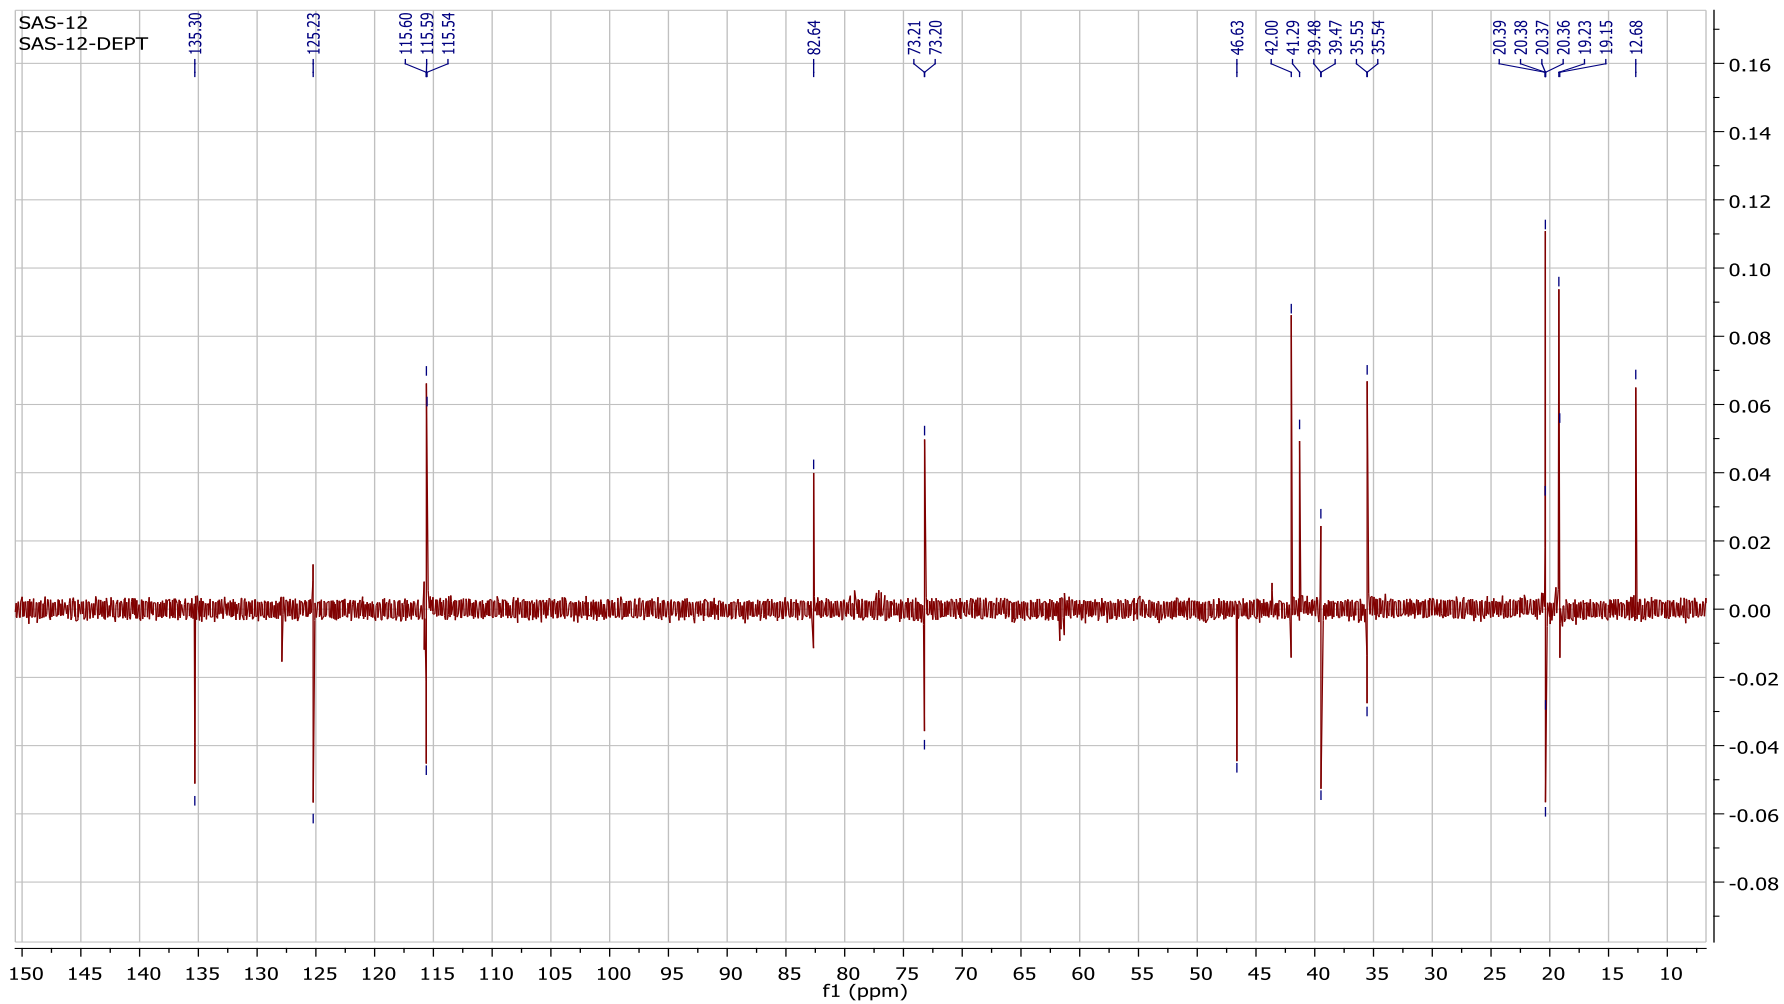

S12:DEPT-135 of 2

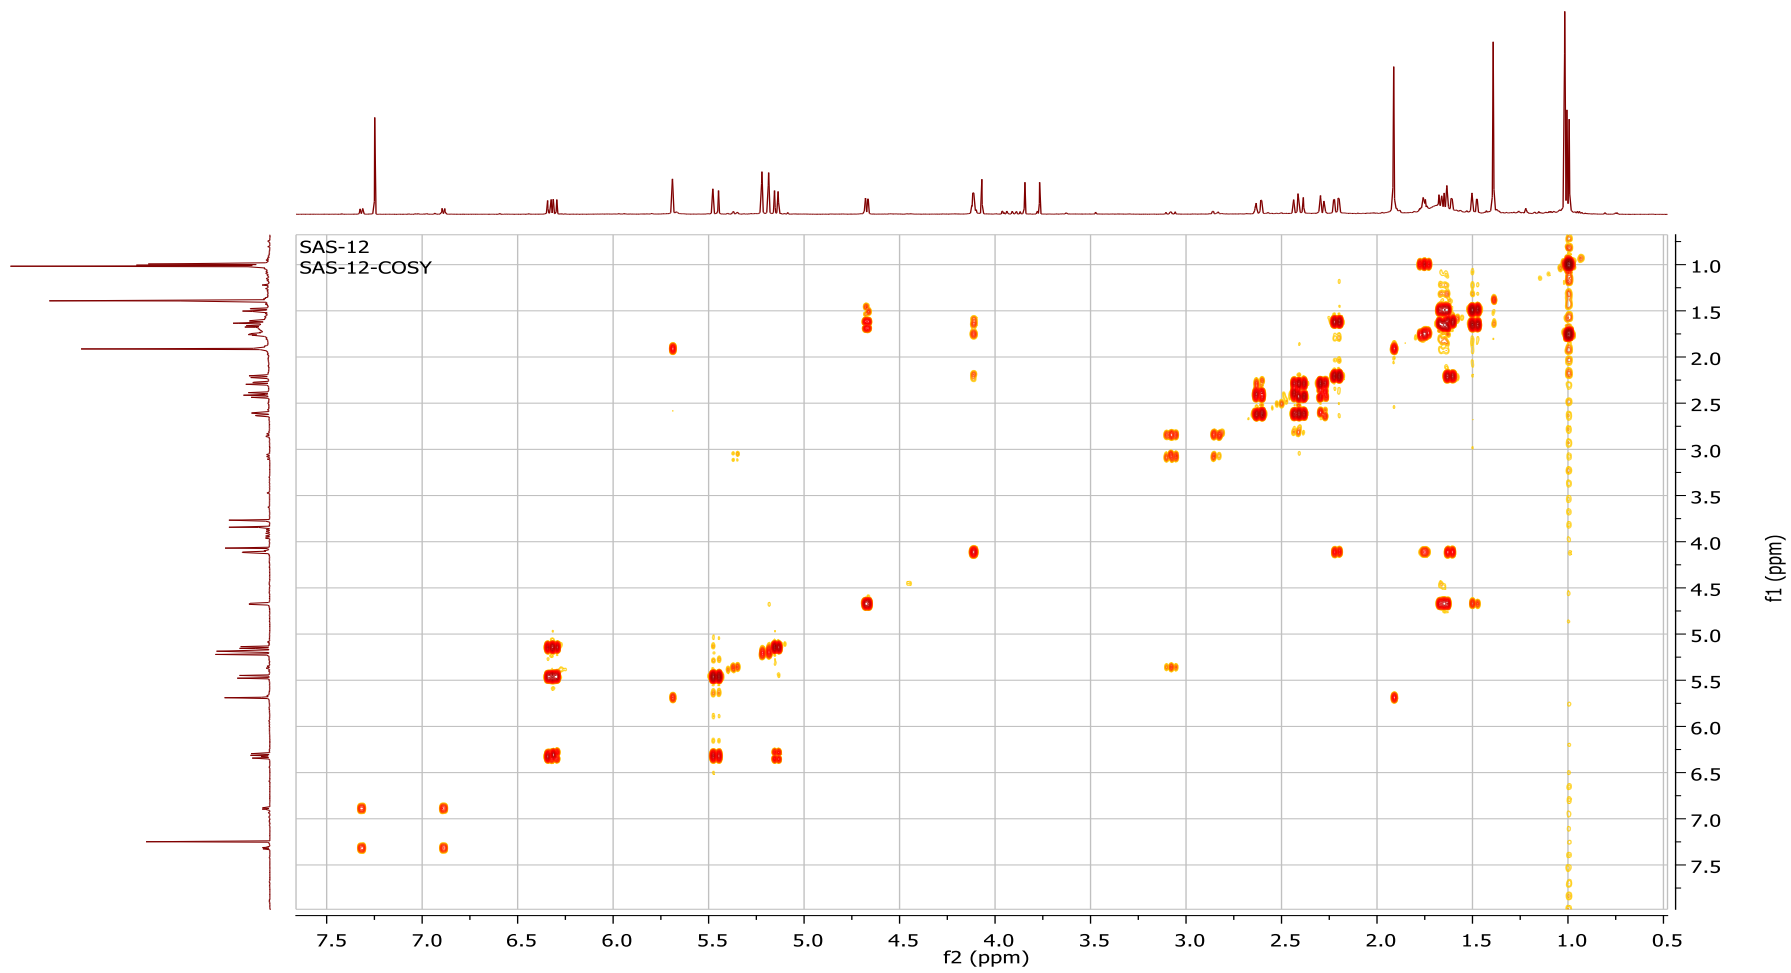

S13:  $^1\text{H}$ - $^1\text{H}$  COSY of 2

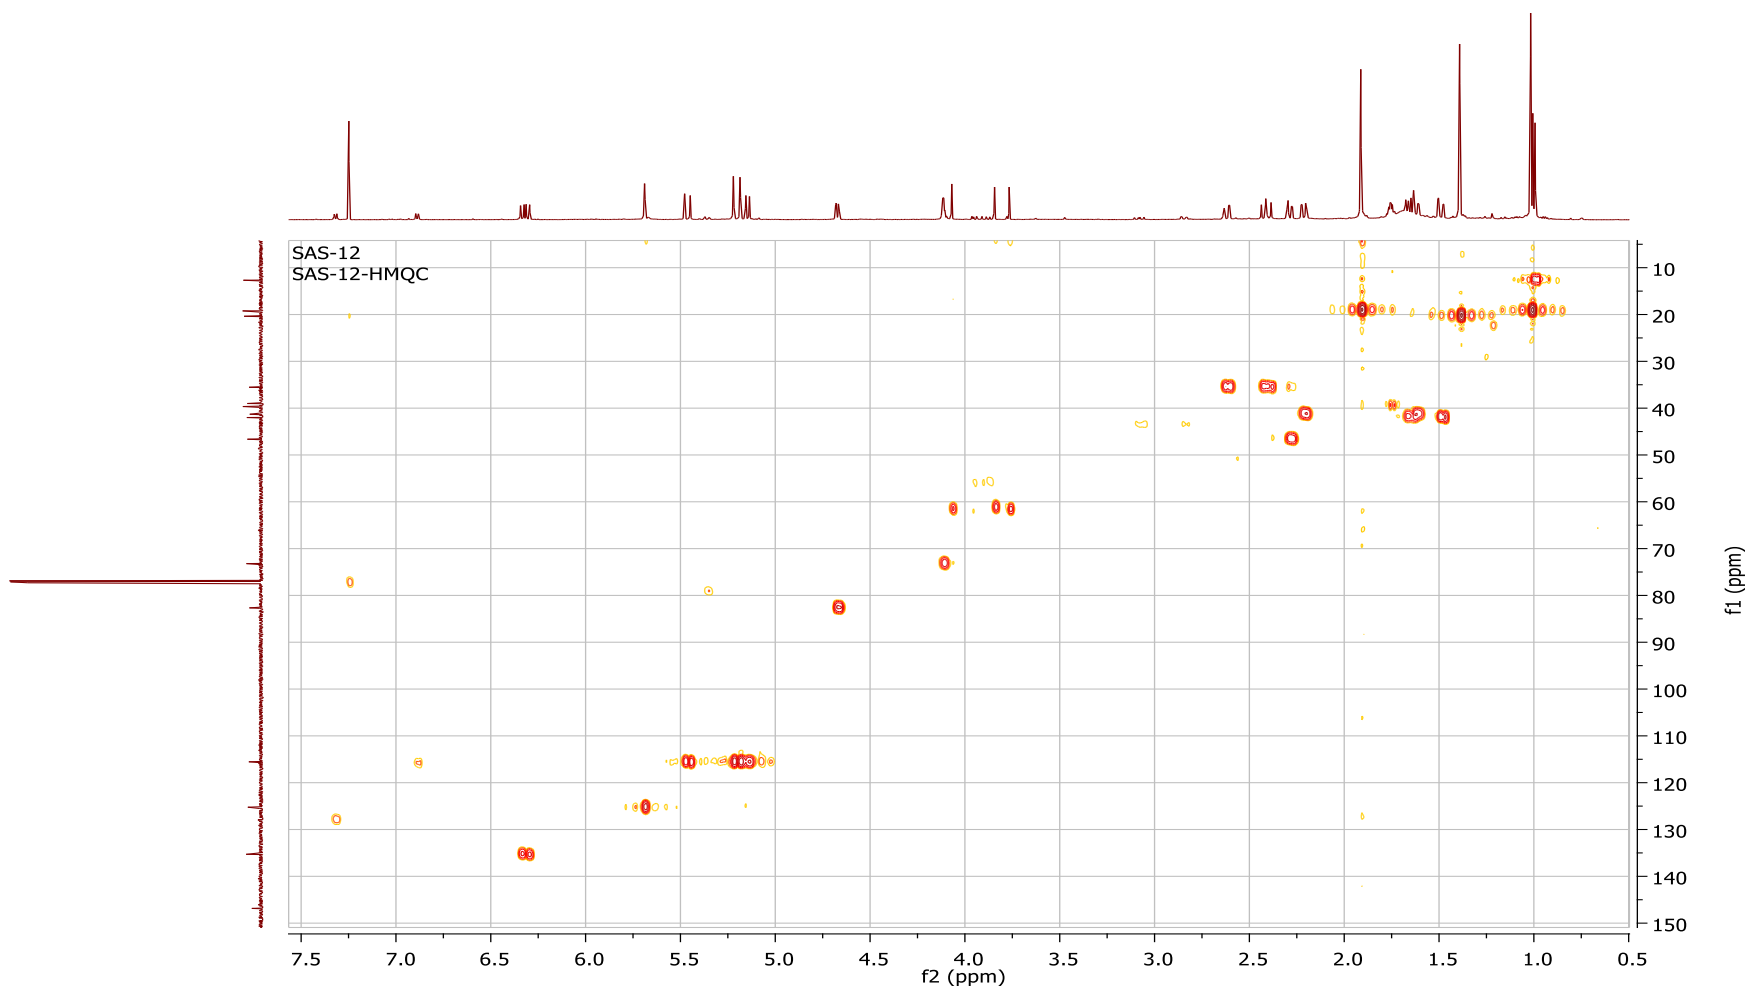

S14:HSQC of 2



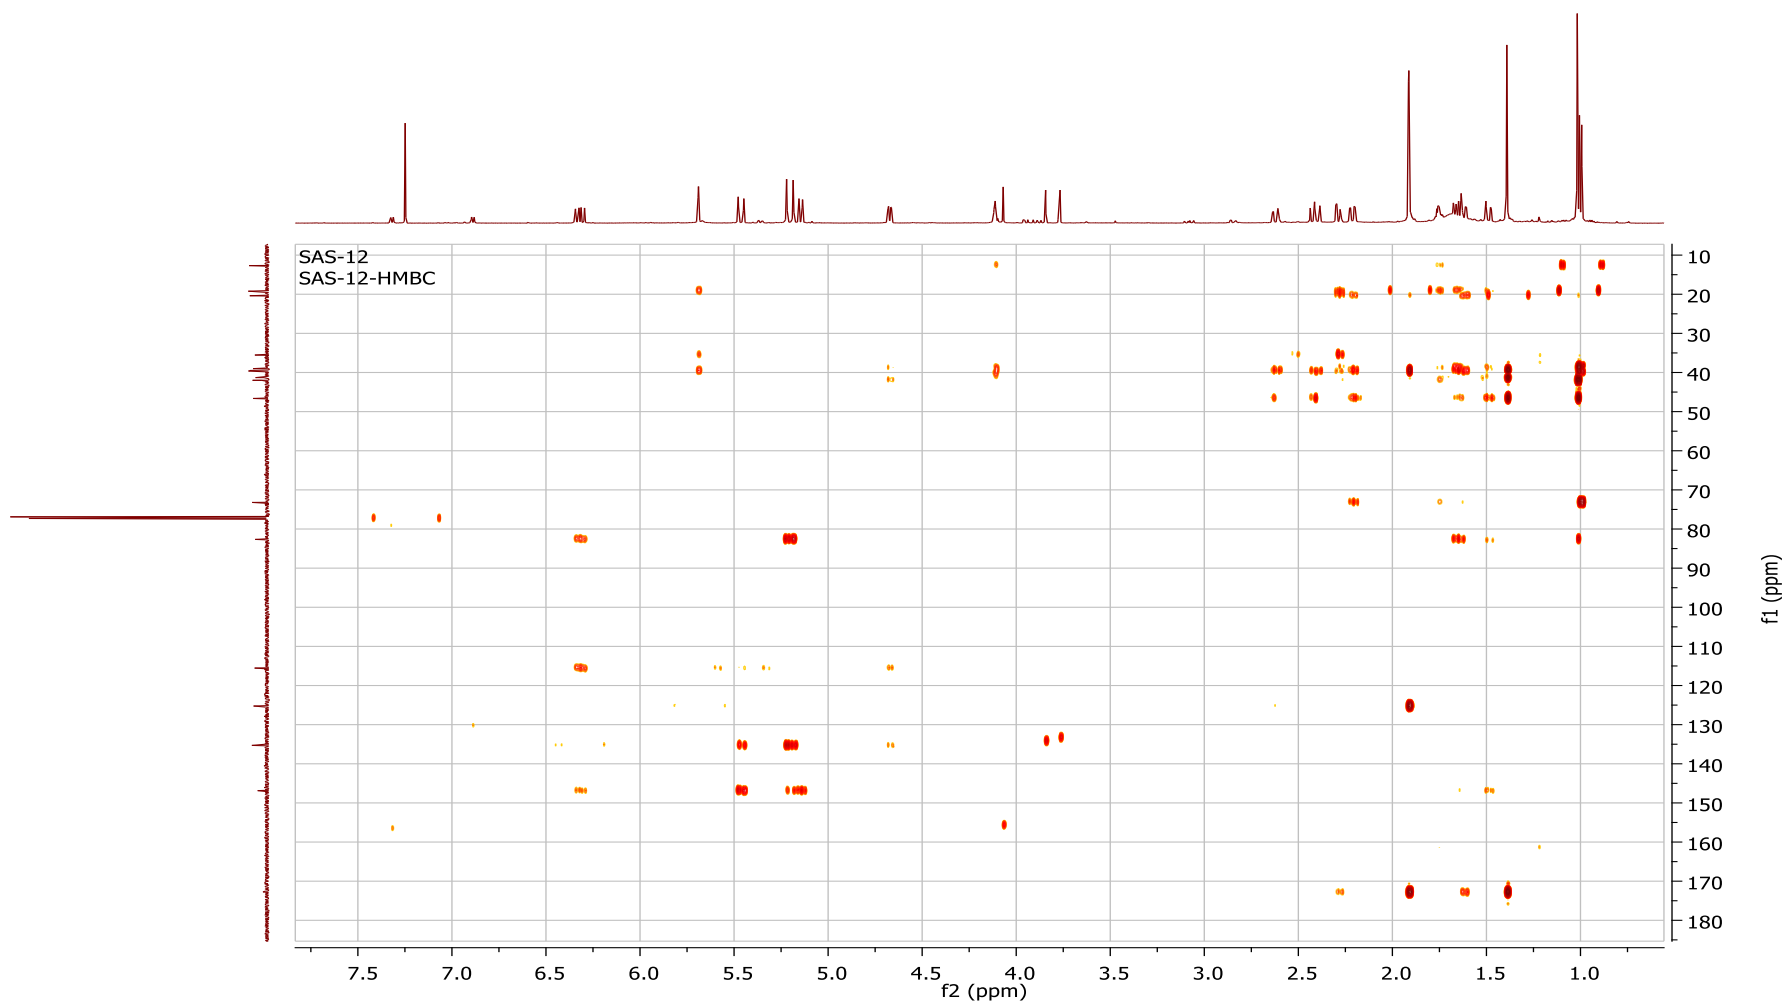

S15:HMBC of 2

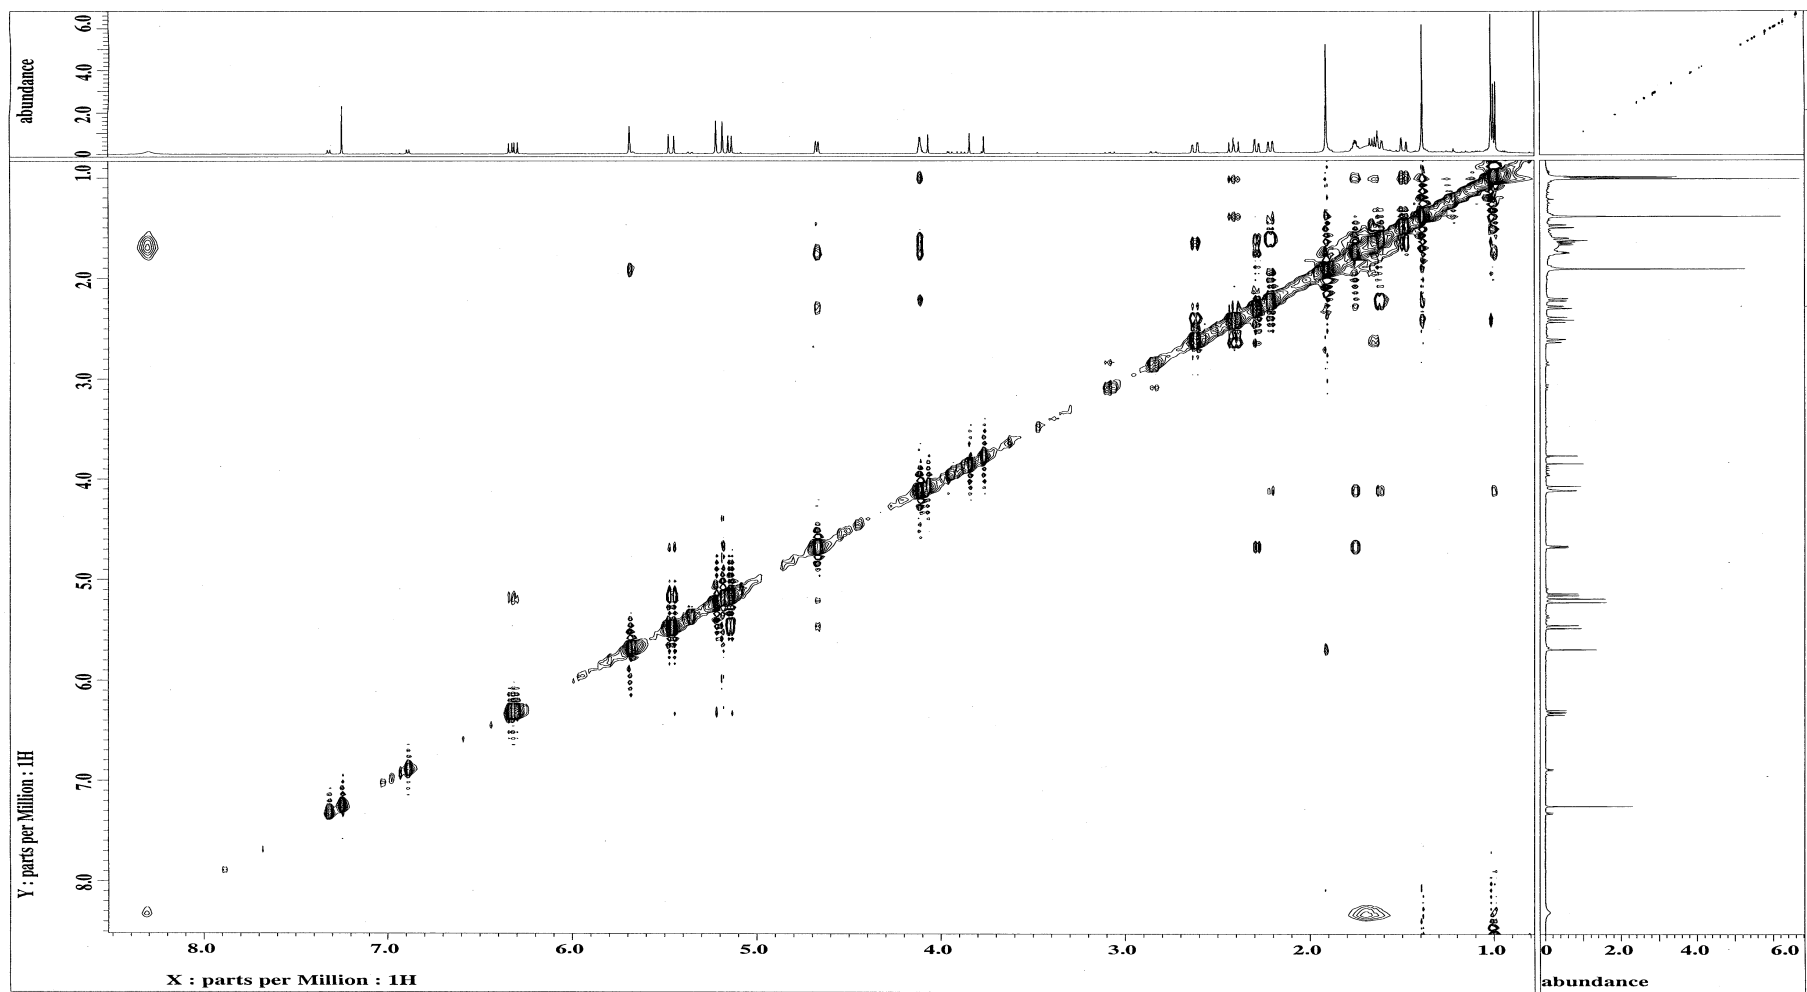

S16:NOESY of 2

Note : 3-N0BR, CHCl3+NaIaq.  
Inlet : Direct Ion Mode : FAB+  
Spectrum Type : Normal Ion [MF-Linear]  
RT : 0.50 min Scan# : (4,5)  
BP : m/z 154.0000 Int. : 574.45  
Output m/z range : 10.0000 to 400.3009

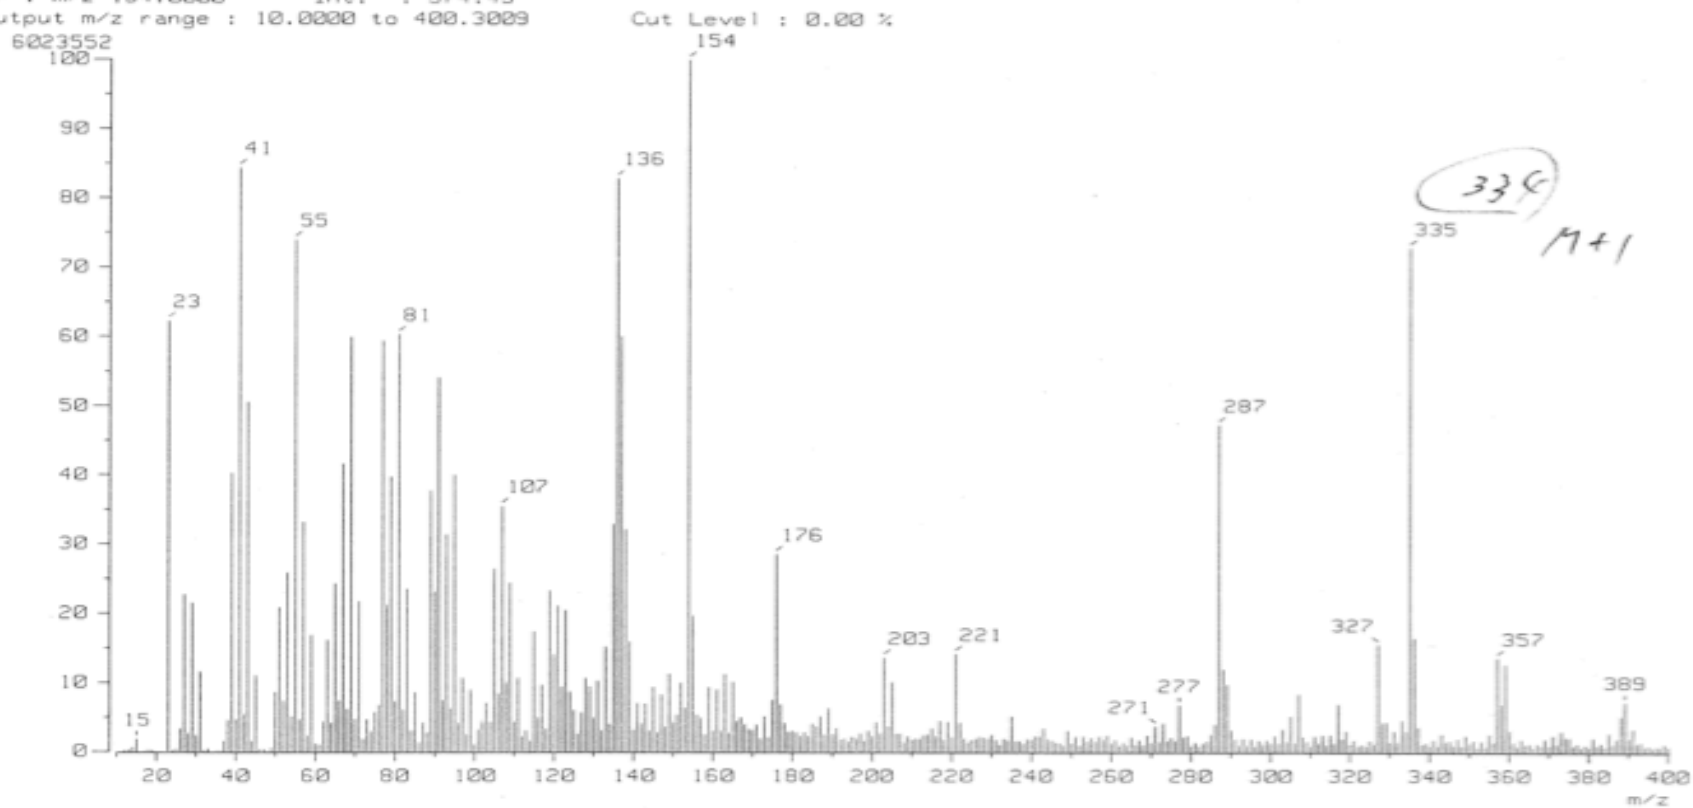

S17:FABMS of 2

Notê : 3-NOBA, CHCl3+NaIaq.

Inlet : Direct

Ion Mode : FAB+

RT : 0.90 min

Scan#: 4

Elements : C 20/0, H 40/0, O 4/0, Na 1/0

Mass Tolerance : 1000ppm, 3mmu if m/z < 3, 5mmu if m/z > 5

Unsaturation (U.S.) : -0.5 - 20.0

| Observed m/z | Int% | Err[ppm / mmu] | U.S. | Composition      |
|--------------|------|----------------|------|------------------|
| 357.2044     | 16.1 | +0.7 / +0.3    | 5.5  | C 20 H 30 O 4 Na |

S18:HRFABMS of 2

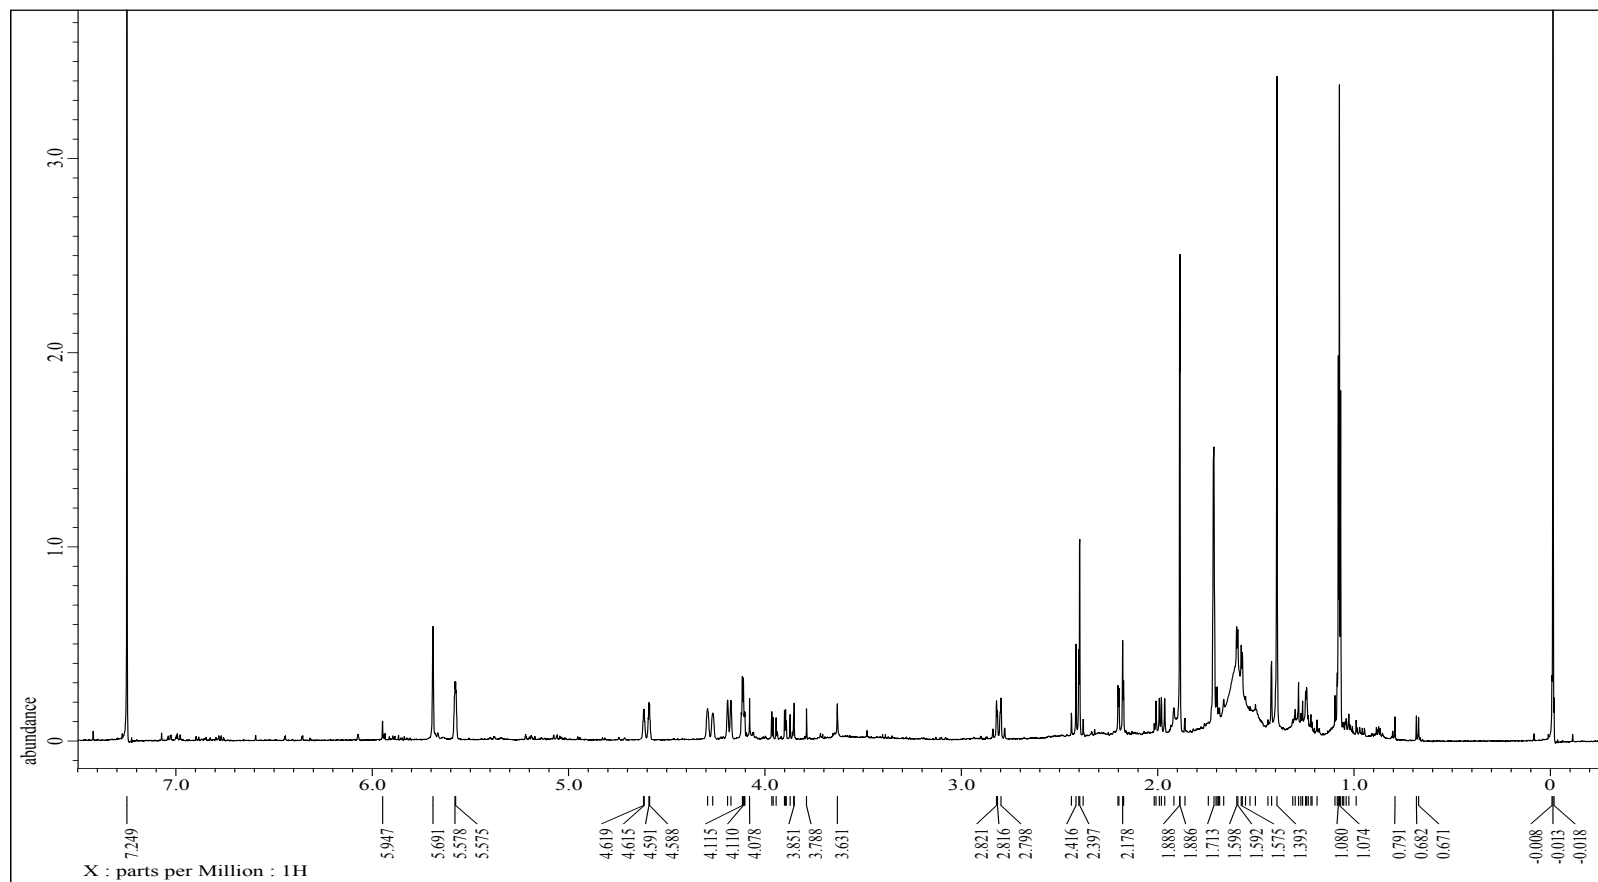

S19:  $^1\text{H}$  NMR of 4

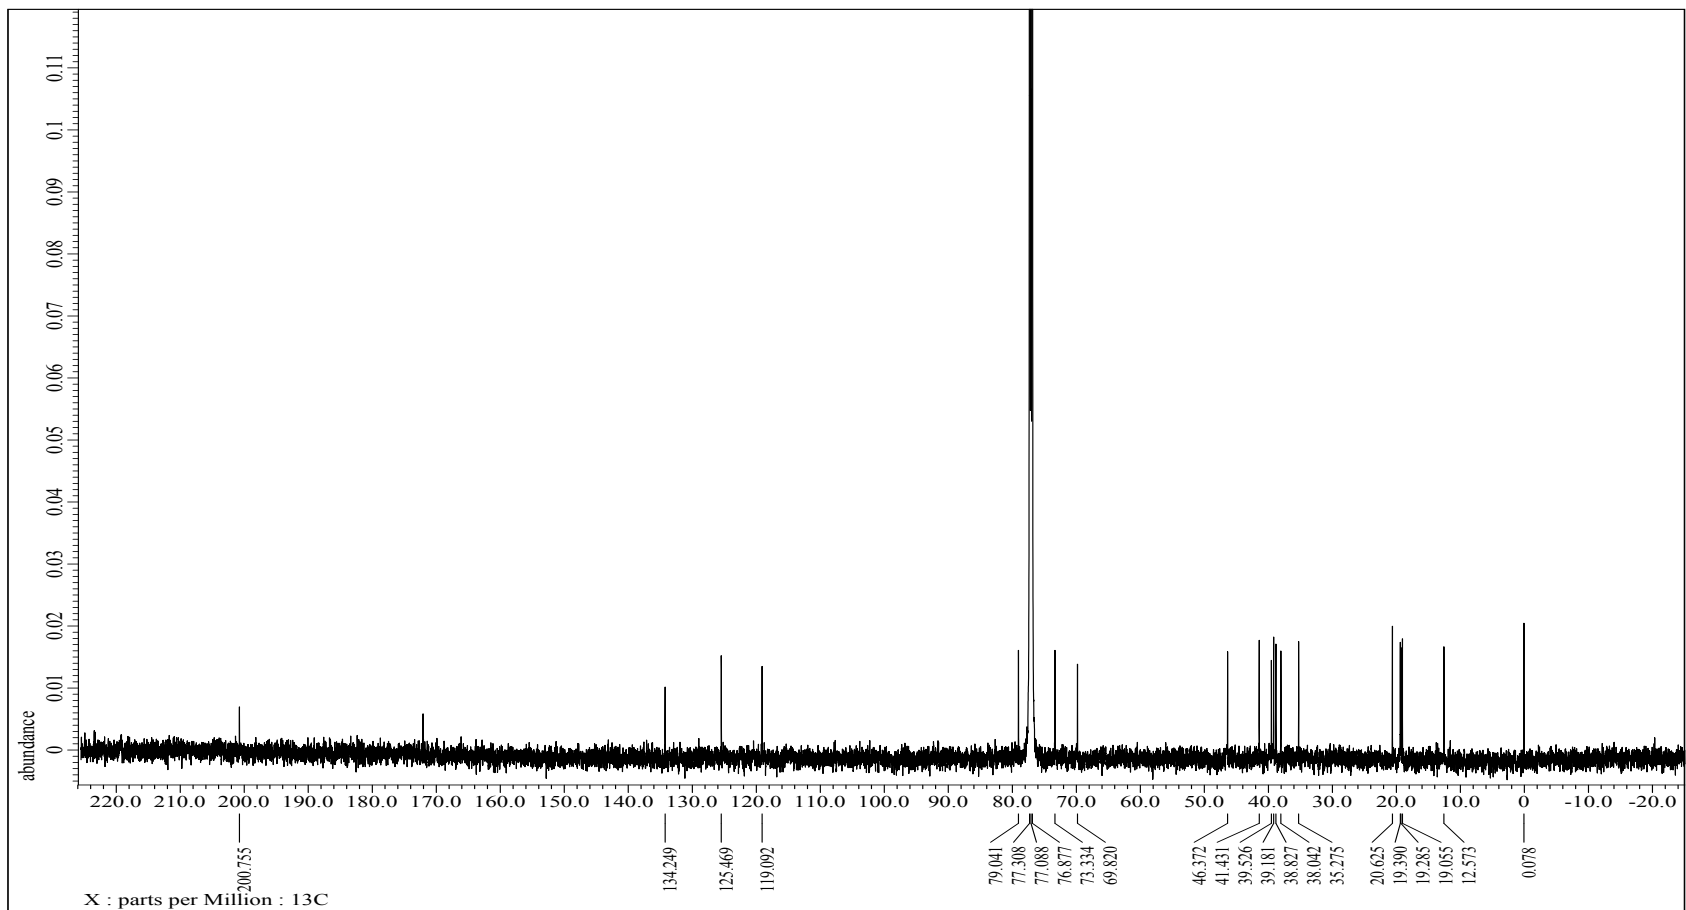

S20:  $^{13}\text{C}$  NMR of 4

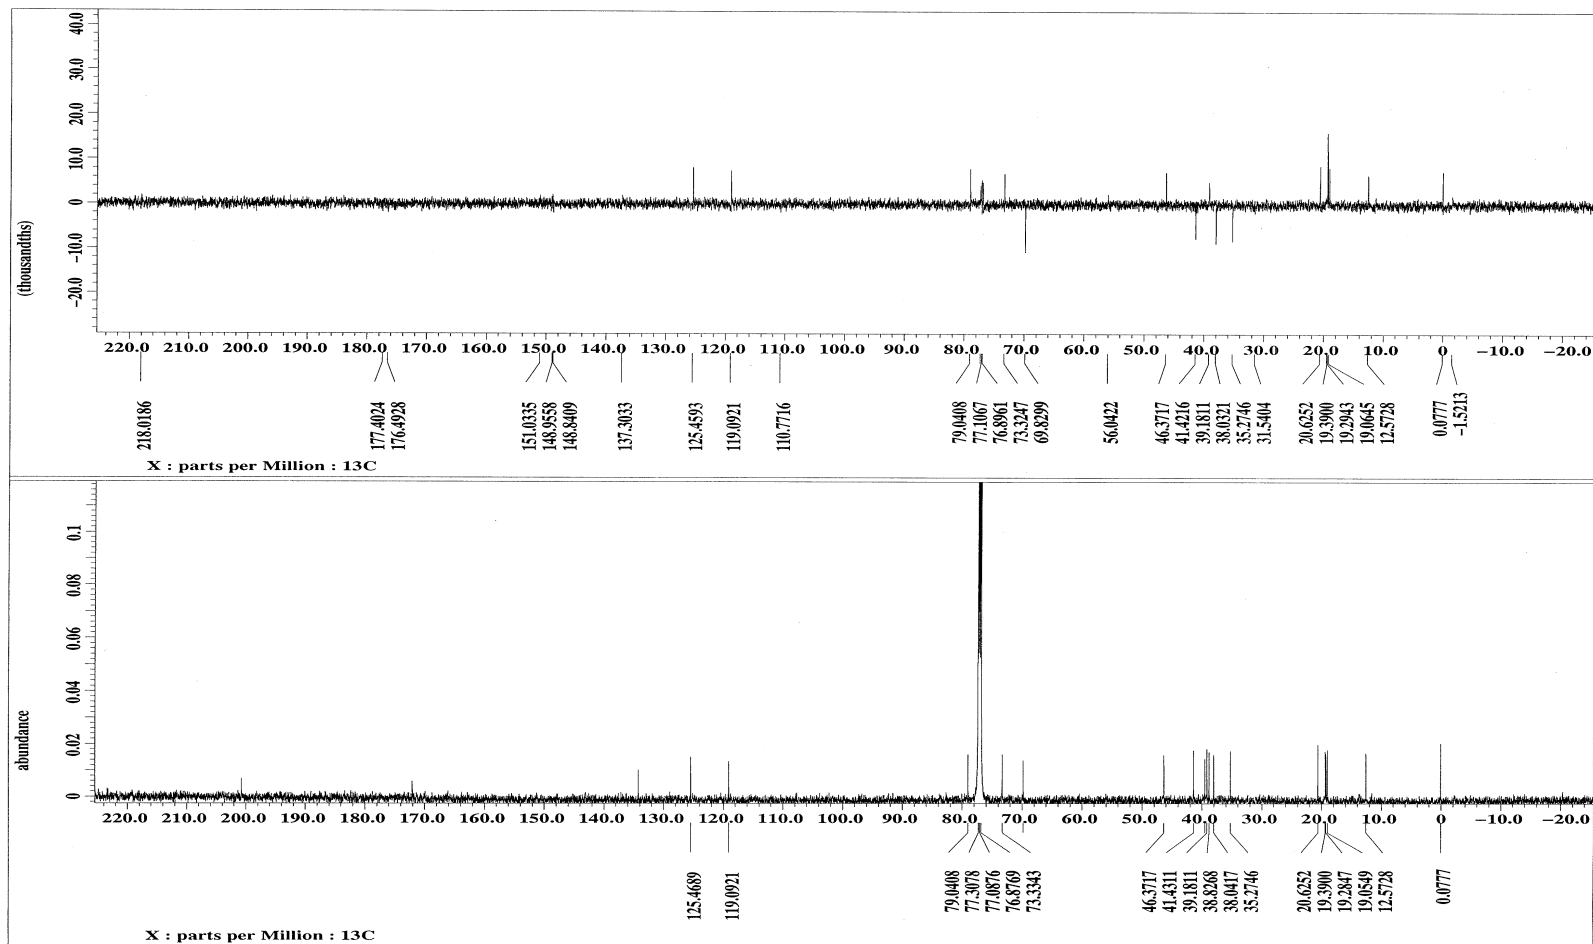

S21:DEPT-135 of 4

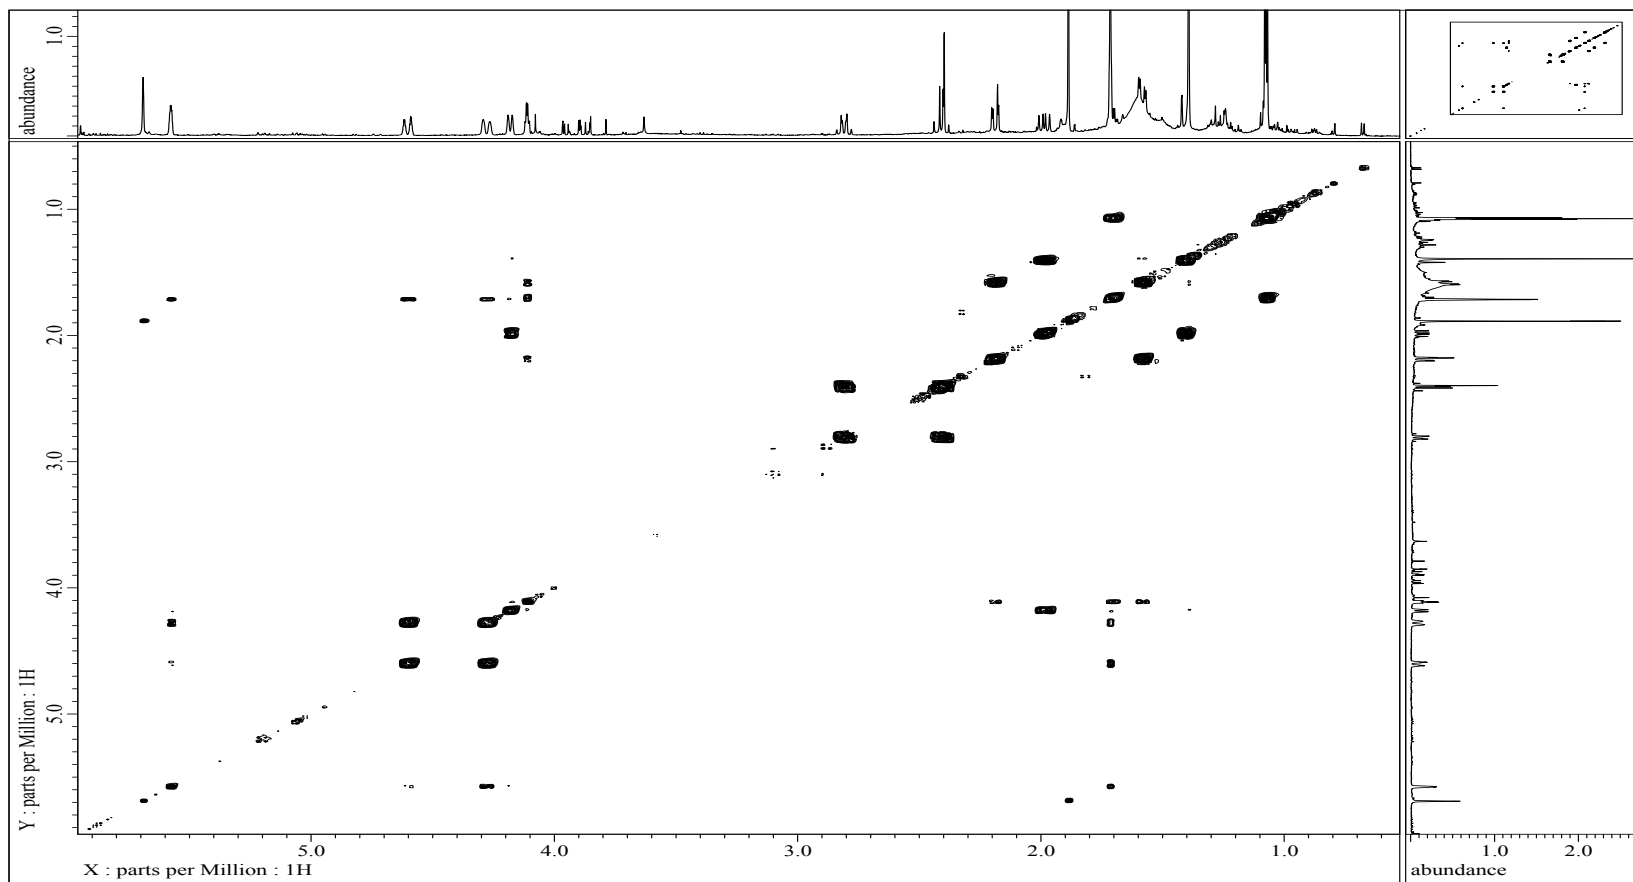

S22:  $^1\text{H}$  COSY of 4



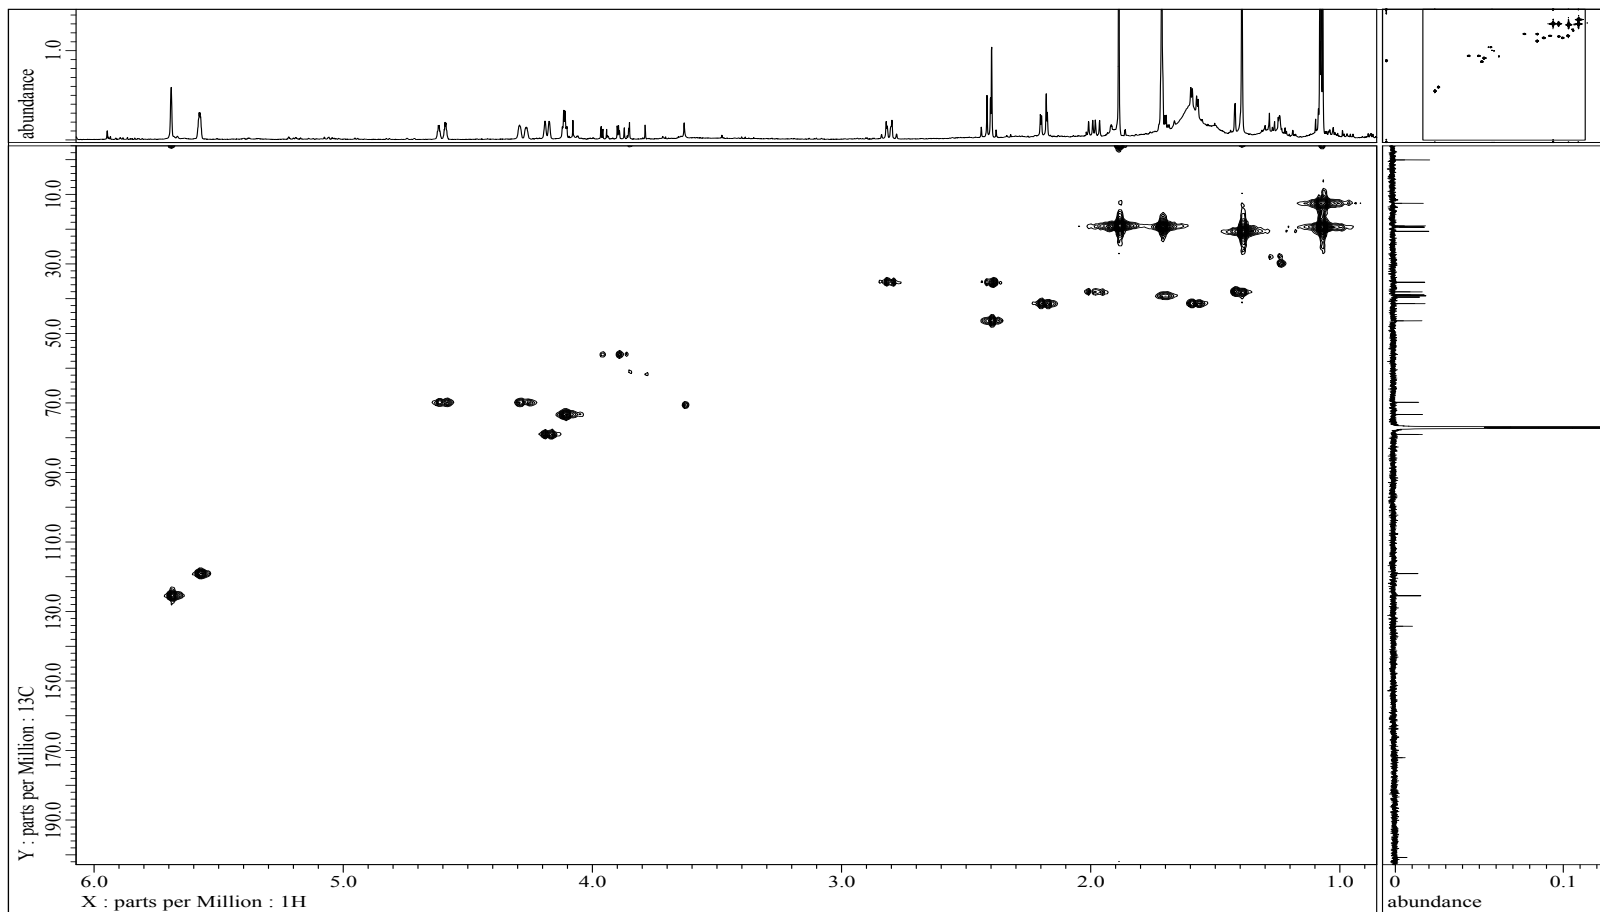

S23:HSQC of 4

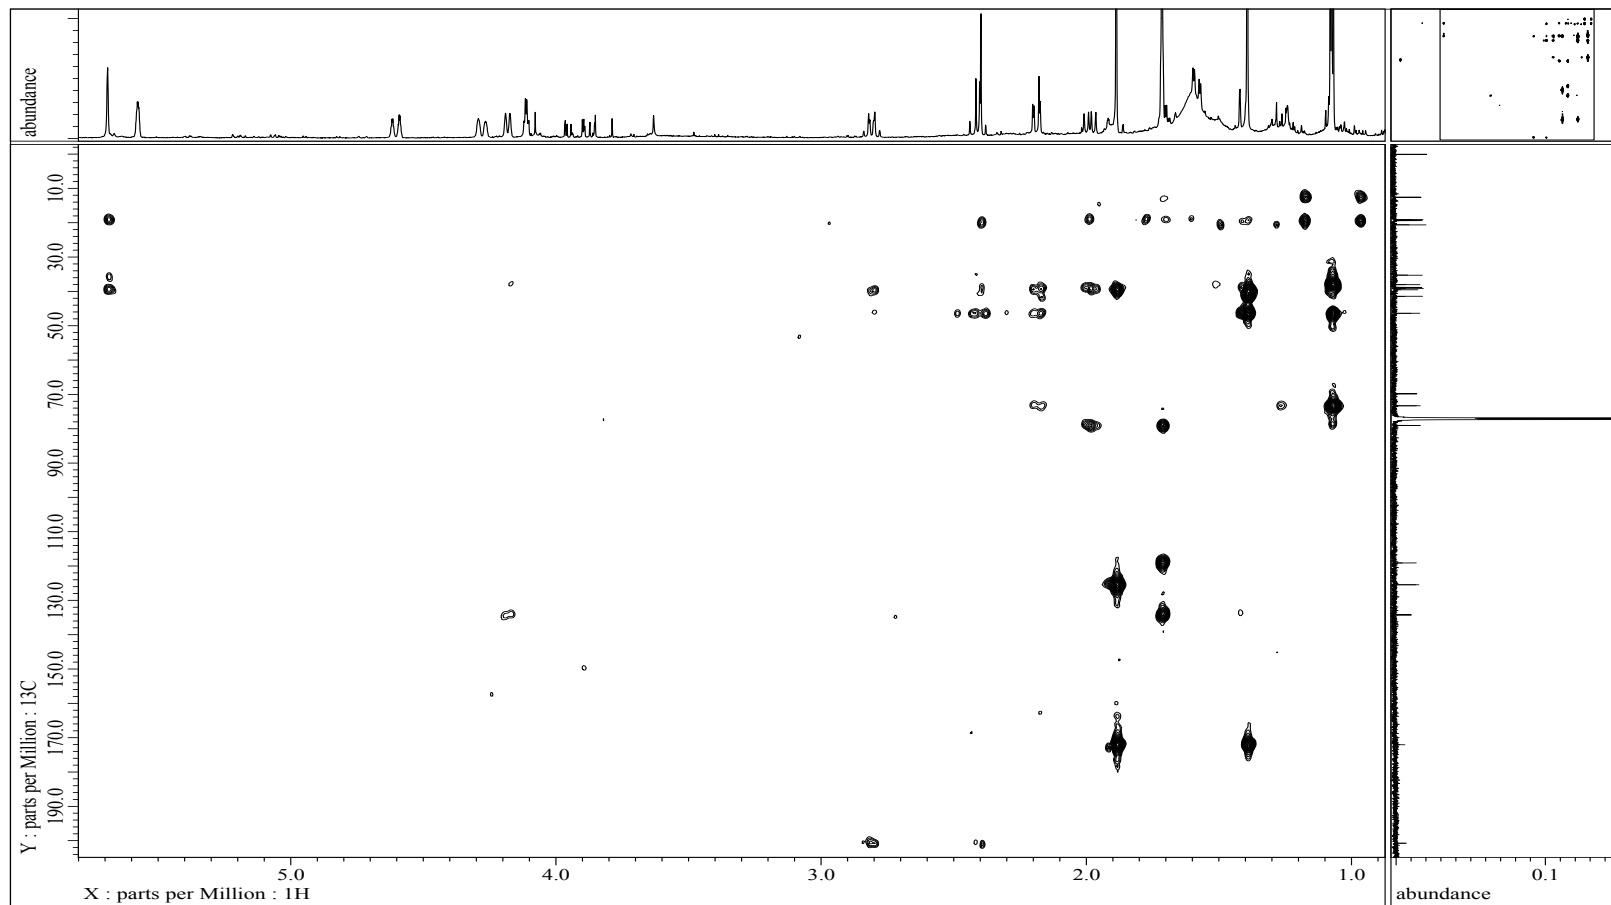

S24:HMBC of 4

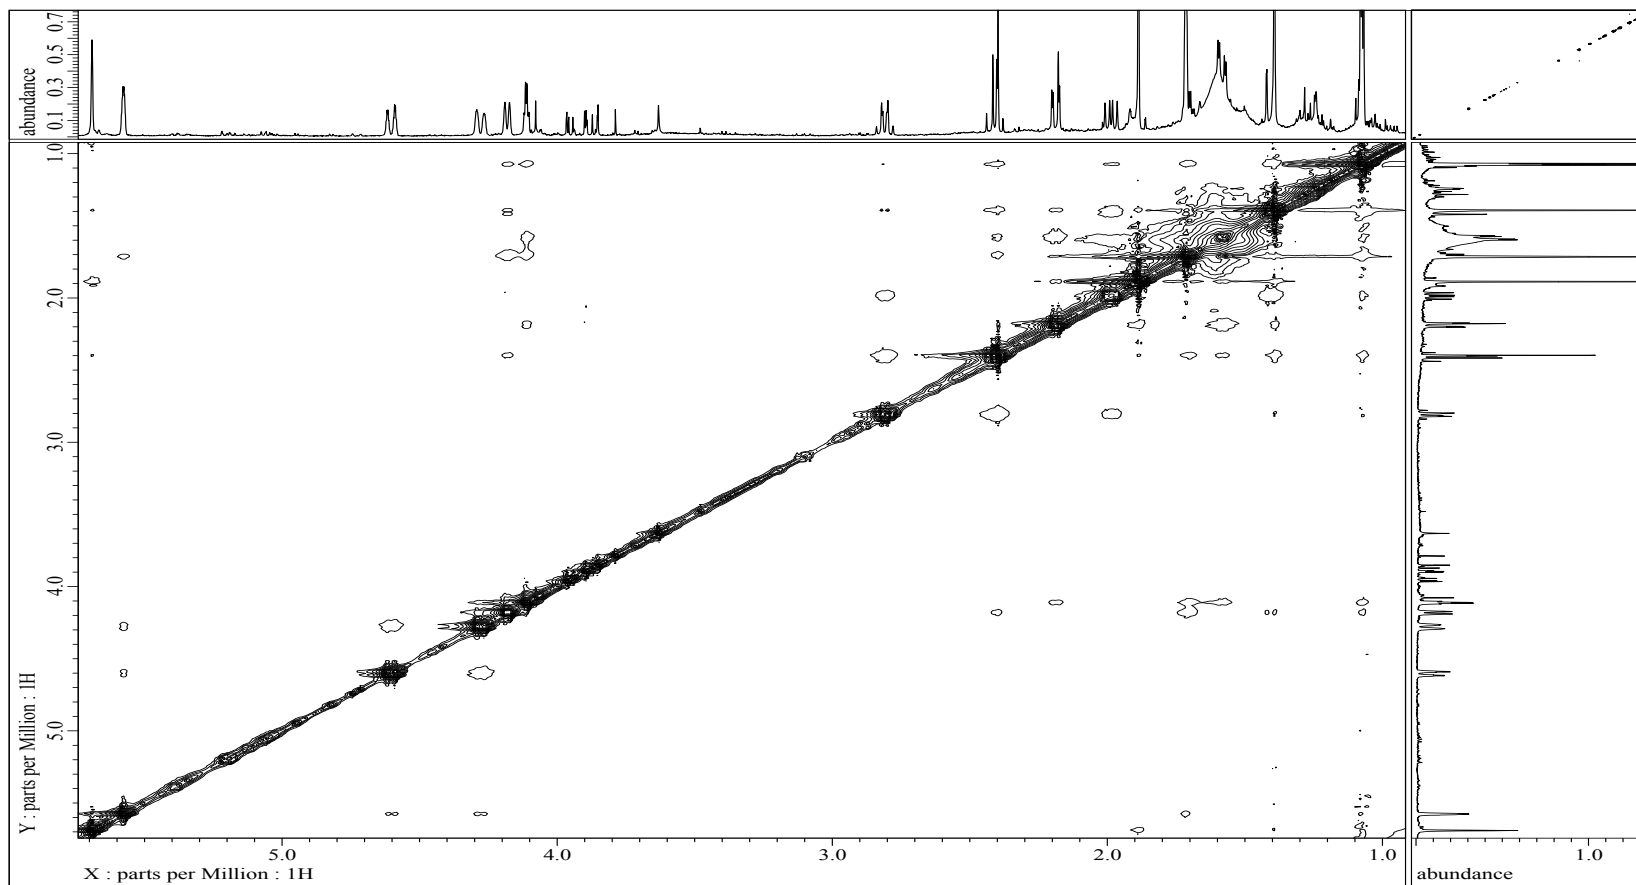

S25:NOESY of 4

Note : 3-NOBR, CHCl3+NaIaq.  
Inlet : Direct Ion Mode : FFB+  
Spectrum Type : Normal Ion [MF-Linear]  
RT : 0.50 min Scan# : (4,5)  
BP : m/z 335.0000 Int. : 617.21  
Output m/z range : 10.0000 to 700.8902 Cut Level : 0.00 %

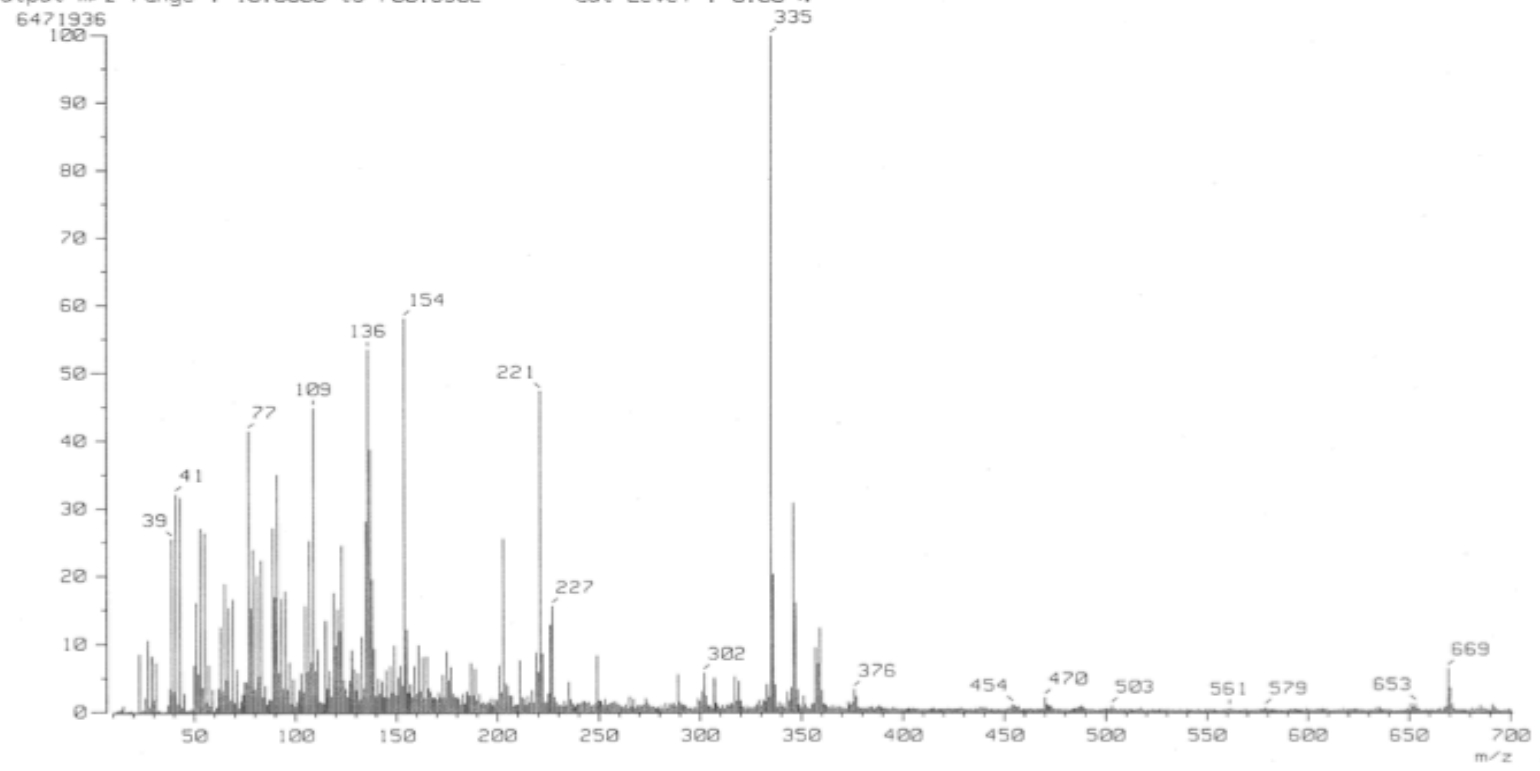

S26:FABMS of 4

Note : 3-NOBA, CHCl<sub>3</sub>+NaIaq.

Inlet : Direct

Ion Mode : FAB+

RT : 0.60 min

Scan#: 3

Elements : C 20/0, H 40/0, O 4/0, Na 1/0

Mass Tolerance : 1000ppm, 3mmu if m/z < 3, 5mmu if m/z > 5

Unsaturation (U.S.) : -0.5 - 20.0

| Observed m/z | Int% | Err[ppm / mmu] | U.S. | Composition |
|--------------|------|----------------|------|-------------|
| 359.1143     | 13.9 |                |      |             |

S27:HRFABMS of 4
